# Supplementary material for: Molecular sieve mediated sequential Knoevenagel condensation/decarboxylative Michael addition reaction: efficient and mild conditions for the synthesis of 3,3-disubstituted oxindoles with an all carbon quaternary center
Source: Royal Society of Chemistry journal article supplement (doi:10.1039/c6ra16975a), 2016-01-01

## Electronic Supplementary Information

### **Molecular sieve mediated sequential Knoevenagel condensation/decarboxylative Michael addition reaction: an efficient and mild condition for the synthesis of 3,3-disubstituted oxindoles with all carbon quaternary center**

Yi-Lin Guo, Yu-Hsun Li, Hsuan-Hao Chang, Ting-Shen Kuo and Jeng-Liang Han\*

Department of Chemistry, Chung Yuan Christian University, Taoyuan City, Taiwan 320

[jlhan@cycu.edu.tw](mailto:jlhan@cycu.edu.tw)

#### **Table of Contents:**

|                                                     |            |
|-----------------------------------------------------|------------|
| <b>1. X-Ray Crystallographic Data of 4g and 5g</b>  | <b>S2</b>  |
| <b>2. Copies of NMR Spectra of Products 4 and 5</b> | <b>S17</b> |

## 1. X-Ray Crystallographic Data of 4g and 5g

### (a) X-Ray Crystallographic Data of 4g

Table 1. Crystal data and structure refinement for 4g.

|                                   |                                                                  |                                                                                                   |
|-----------------------------------|------------------------------------------------------------------|---------------------------------------------------------------------------------------------------|
| Identification code               | a18075                                                           |                                                                                                   |
| Empirical formula                 | C <sub>19</sub> H <sub>12</sub> Br N <sub>3</sub> O <sub>2</sub> |                                                                                                   |
| Formula weight                    | 394.23                                                           |                                                                                                   |
| Temperature                       | 296(2) K                                                         |                                                                                                   |
| Wavelength                        | 0.71073 Å                                                        |                                                                                                   |
| Crystal system                    | Triclinic                                                        |                                                                                                   |
| Space group                       | P -1                                                             |                                                                                                   |
| Unit cell dimensions              | a = 8.9365(8) Å<br>b = 10.0229(9) Å<br>c = 10.5846(10) Å         | $\alpha = 72.6120(10)^\circ$ .<br>$\beta = 68.3510(10)^\circ$ .<br>$\gamma = 78.5860(10)^\circ$ . |
| Volume                            | 836.80(13) Å <sup>3</sup>                                        |                                                                                                   |
| Z                                 | 2                                                                |                                                                                                   |
| Density (calculated)              | 1.565 Mg/m <sup>3</sup>                                          |                                                                                                   |
| Absorption coefficient            | 2.474 mm <sup>-1</sup>                                           |                                                                                                   |
| F(000)                            | 396                                                              |                                                                                                   |
| Crystal size                      | 0.28 x 0.25 x 0.11 mm <sup>3</sup>                               |                                                                                                   |
| Theta range for data collection   | 2.14 to 25.08°.                                                  |                                                                                                   |
| Index ranges                      | -10 ≤ h ≤ 9, -11 ≤ k ≤ 11, -12 ≤ l ≤ 12                          |                                                                                                   |
| Reflections collected             | 7437                                                             |                                                                                                   |
| Independent reflections           | 2952 [R(int) = 0.0223]                                           |                                                                                                   |
| Completeness to theta = 25.08°    | 99.0 %                                                           |                                                                                                   |
| Absorption correction             | multi-scan                                                       |                                                                                                   |
| Max. and min. transmission        | 0.7726 and 0.5442                                                |                                                                                                   |
| Refinement method                 | Full-matrix least-squares on F <sup>2</sup>                      |                                                                                                   |
| Data / restraints / parameters    | 2952 / 0 / 226                                                   |                                                                                                   |
| Goodness-of-fit on F <sup>2</sup> | 1.037                                                            |                                                                                                   |
| Final R indices [I > 2σ(I)]       | R1 = 0.0283, wR2 = 0.0624                                        |                                                                                                   |
| R indices (all data)              | R1 = 0.0380, wR2 = 0.0658                                        |                                                                                                   |
| Largest diff. peak and hole       | 0.202 and -0.364 e.Å <sup>-3</sup>                               |                                                                                                   |

Table 2. Atomic coordinates ( $\times 10^4$ ) and equivalent isotropic displacement parameters ( $\text{\AA}^2 \times 10^3$ ) for a18075.  $U(\text{eq})$  is defined as one third of the trace of the orthogonalized  $U^{ij}$  tensor.

|       | x        | y       | z        | U(eq) |
|-------|----------|---------|----------|-------|
| C(1)  | 13238(2) | 2024(2) | 5720(2)  | 37(1) |
| C(2)  | 13644(2) | 703(2)  | 6457(2)  | 41(1) |
| C(3)  | 12449(2) | -95(2)  | 7475(2)  | 39(1) |
| C(4)  | 10861(2) | 471(2)  | 7713(2)  | 30(1) |
| C(5)  | 10459(2) | 1803(2) | 6953(2)  | 27(1) |
| C(6)  | 11647(2) | 2599(2) | 5951(2)  | 31(1) |
| C(7)  | 8646(2)  | 2116(2) | 7454(2)  | 27(1) |
| C(8)  | 8118(2)  | 816(2)  | 8699(2)  | 30(1) |
| C(9)  | 7876(2)  | 2070(2) | 6357(2)  | 32(1) |
| C(10) | 8068(3)  | 660(3)  | 6134(2)  | 39(1) |
| C(11) | 8530(3)  | 3101(2) | 5014(2)  | 38(1) |
| C(12) | 7985(2)  | 3502(2) | 7889(2)  | 30(1) |
| C(13) | 8367(2)  | 3579(2) | 9138(2)  | 29(1) |
| C(14) | 7746(2)  | 4850(2) | 9693(2)  | 30(1) |
| C(15) | 7039(3)  | 6058(2) | 8985(2)  | 45(1) |
| C(16) | 6490(3)  | 7215(2) | 9543(3)  | 53(1) |
| C(17) | 6624(3)  | 7180(2) | 10800(2) | 47(1) |
| C(18) | 7314(3)  | 5992(3) | 11511(2) | 49(1) |
| C(19) | 7884(3)  | 4829(2) | 10964(2) | 40(1) |
| N(1)  | 9059(3)  | 3919(2) | 4014(2)  | 58(1) |
| N(2)  | 8151(3)  | -444(2) | 6026(2)  | 63(1) |
| N(3)  | 9454(2)  | -100(2) | 8701(2)  | 33(1) |
| O(1)  | 6736(2)  | 656(2)  | 9467(2)  | 44(1) |
| O(2)  | 9137(2)  | 2590(1) | 9697(2)  | 42(1) |
| Br(1) | 14892(1) | 3118(1) | 4329(1)  | 60(1) |

Table 3. Bond lengths [ $\text{\AA}$ ] and angles [ $^\circ$ ] for a18075.

---

|              |          |
|--------------|----------|
| C(1)-C(2)    | 1.376(3) |
| C(1)-C(6)    | 1.384(3) |
| C(1)-Br(1)   | 1.904(2) |
| C(2)-C(3)    | 1.384(3) |
| C(2)-H(2)    | 0.9300   |
| C(3)-C(4)    | 1.379(3) |
| C(3)-H(3)    | 0.9300   |
| C(4)-C(5)    | 1.392(3) |
| C(4)-N(3)    | 1.400(2) |
| C(5)-C(6)    | 1.374(3) |
| C(5)-C(7)    | 1.507(3) |
| C(6)-H(6)    | 0.9300   |
| C(7)-C(12)   | 1.532(3) |
| C(7)-C(8)    | 1.554(3) |
| C(7)-C(9)    | 1.567(3) |
| C(8)-O(1)    | 1.213(2) |
| C(8)-N(3)    | 1.354(2) |
| C(9)-C(10)   | 1.469(3) |
| C(9)-C(11)   | 1.476(3) |
| C(9)-H(9)    | 0.9800   |
| C(10)-N(2)   | 1.131(3) |
| C(11)-N(1)   | 1.133(3) |
| C(12)-C(13)  | 1.509(3) |
| C(12)-H(12A) | 0.9700   |
| C(12)-H(12B) | 0.9700   |
| C(13)-O(2)   | 1.218(2) |
| C(13)-C(14)  | 1.484(3) |
| C(14)-C(15)  | 1.389(3) |
| C(14)-C(19)  | 1.390(3) |
| C(15)-C(16)  | 1.380(3) |
| C(15)-H(15)  | 0.9300   |
| C(16)-C(17)  | 1.369(3) |
| C(16)-H(16)  | 0.9300   |
| C(17)-C(18)  | 1.370(3) |
| C(17)-H(17)  | 0.9300   |
| C(18)-C(19)  | 1.380(3) |

|                  |            |
|------------------|------------|
| C(18)-H(18)      | 0.9300     |
| C(19)-H(19)      | 0.9300     |
| N(3)-H(3')       | 0.8901     |
|                  |            |
| C(2)-C(1)-C(6)   | 122.14(19) |
| C(2)-C(1)-Br(1)  | 119.88(15) |
| C(6)-C(1)-Br(1)  | 117.98(16) |
| C(1)-C(2)-C(3)   | 120.21(19) |
| C(1)-C(2)-H(2)   | 119.9      |
| C(3)-C(2)-H(2)   | 119.9      |
| C(4)-C(3)-C(2)   | 118.03(19) |
| C(4)-C(3)-H(3)   | 121.0      |
| C(2)-C(3)-H(3)   | 121.0      |
| C(3)-C(4)-C(5)   | 121.41(18) |
| C(3)-C(4)-N(3)   | 128.93(18) |
| C(5)-C(4)-N(3)   | 109.64(16) |
| C(6)-C(5)-C(4)   | 120.53(18) |
| C(6)-C(5)-C(7)   | 130.84(17) |
| C(4)-C(5)-C(7)   | 108.62(16) |
| C(5)-C(6)-C(1)   | 117.68(19) |
| C(5)-C(6)-H(6)   | 121.2      |
| C(1)-C(6)-H(6)   | 121.2      |
| C(5)-C(7)-C(12)  | 116.44(15) |
| C(5)-C(7)-C(8)   | 101.87(14) |
| C(12)-C(7)-C(8)  | 112.28(15) |
| C(5)-C(7)-C(9)   | 112.38(15) |
| C(12)-C(7)-C(9)  | 107.60(15) |
| C(8)-C(7)-C(9)   | 105.76(15) |
| O(1)-C(8)-N(3)   | 127.76(18) |
| O(1)-C(8)-C(7)   | 124.75(17) |
| N(3)-C(8)-C(7)   | 107.40(15) |
| C(10)-C(9)-C(11) | 110.68(17) |
| C(10)-C(9)-C(7)  | 112.80(16) |
| C(11)-C(9)-C(7)  | 110.94(16) |
| C(10)-C(9)-H(9)  | 107.4      |
| C(11)-C(9)-H(9)  | 107.4      |
| C(7)-C(9)-H(9)   | 107.4      |
| N(2)-C(10)-C(9)  | 176.4(2)   |

|                     |            |
|---------------------|------------|
| N(1)-C(11)-C(9)     | 176.9(2)   |
| C(13)-C(12)-C(7)    | 113.67(15) |
| C(13)-C(12)-H(12A)  | 108.8      |
| C(7)-C(12)-H(12A)   | 108.8      |
| C(13)-C(12)-H(12B)  | 108.8      |
| C(7)-C(12)-H(12B)   | 108.8      |
| H(12A)-C(12)-H(12B) | 107.7      |
| O(2)-C(13)-C(14)    | 121.18(18) |
| O(2)-C(13)-C(12)    | 119.87(17) |
| C(14)-C(13)-C(12)   | 118.92(16) |
| C(15)-C(14)-C(19)   | 119.00(19) |
| C(15)-C(14)-C(13)   | 122.39(18) |
| C(19)-C(14)-C(13)   | 118.61(18) |
| C(16)-C(15)-C(14)   | 120.1(2)   |
| C(16)-C(15)-H(15)   | 120.0      |
| C(14)-C(15)-H(15)   | 120.0      |
| C(17)-C(16)-C(15)   | 120.4(2)   |
| C(17)-C(16)-H(16)   | 119.8      |
| C(15)-C(16)-H(16)   | 119.8      |
| C(16)-C(17)-C(18)   | 120.0(2)   |
| C(16)-C(17)-H(17)   | 120.0      |
| C(18)-C(17)-H(17)   | 120.0      |
| C(17)-C(18)-C(19)   | 120.4(2)   |
| C(17)-C(18)-H(18)   | 119.8      |
| C(19)-C(18)-H(18)   | 119.8      |
| C(18)-C(19)-C(14)   | 120.0(2)   |
| C(18)-C(19)-H(19)   | 120.0      |
| C(14)-C(19)-H(19)   | 120.0      |
| C(8)-N(3)-C(4)      | 111.97(16) |
| C(8)-N(3)-H(3')     | 124.4      |
| C(4)-N(3)-H(3')     | 123.6      |

---

Symmetry transformations used to generate equivalent atoms:

Table 4. Anisotropic displacement parameters ( $\text{\AA}^2 \times 10^3$ ) for a18075. The anisotropic displacement factor exponent takes the form:  $-2\pi^2 [ h^2 a^{*2} U^{11} + \dots + 2 h k a^* b^* U^{12} ]$

|       | U <sup>11</sup> | U <sup>22</sup> | U <sup>33</sup> | U <sup>23</sup> | U <sup>13</sup> | U <sup>12</sup> |
|-------|-----------------|-----------------|-----------------|-----------------|-----------------|-----------------|
| C(1)  | 31(1)           | 49(1)           | 36(1)           | -19(1)          | -9(1)           | -7(1)           |
| C(2)  | 30(1)           | 53(1)           | 43(1)           | -20(1)          | -15(1)          | 8(1)            |
| C(3)  | 37(1)           | 38(1)           | 42(1)           | -13(1)          | -19(1)          | 10(1)           |
| C(4)  | 33(1)           | 30(1)           | 31(1)           | -13(1)          | -13(1)          | 2(1)            |
| C(5)  | 30(1)           | 28(1)           | 29(1)           | -12(1)          | -14(1)          | 1(1)            |
| C(6)  | 34(1)           | 31(1)           | 33(1)           | -11(1)          | -14(1)          | -3(1)           |
| C(7)  | 27(1)           | 26(1)           | 31(1)           | -8(1)           | -13(1)          | 0(1)            |
| C(8)  | 33(1)           | 26(1)           | 35(1)           | -11(1)          | -13(1)          | -1(1)           |
| C(9)  | 30(1)           | 33(1)           | 39(1)           | -12(1)          | -17(1)          | 2(1)            |
| C(10) | 39(1)           | 44(1)           | 43(1)           | -15(1)          | -18(1)          | -7(1)           |
| C(11) | 44(1)           | 38(1)           | 42(1)           | -11(1)          | -26(1)          | -2(1)           |
| C(12) | 32(1)           | 25(1)           | 34(1)           | -8(1)           | -14(1)          | 2(1)            |
| C(13) | 29(1)           | 25(1)           | 32(1)           | -5(1)           | -9(1)           | -1(1)           |
| C(14) | 31(1)           | 27(1)           | 33(1)           | -8(1)           | -9(1)           | -2(1)           |
| C(15) | 58(1)           | 35(1)           | 39(1)           | -14(1)          | -18(1)          | 10(1)           |
| C(16) | 64(2)           | 31(1)           | 54(1)           | -11(1)          | -17(1)          | 11(1)           |
| C(17) | 49(1)           | 35(1)           | 55(1)           | -23(1)          | -5(1)           | -4(1)           |
| C(18) | 59(2)           | 50(2)           | 46(1)           | -26(1)          | -17(1)          | -4(1)           |
| C(19) | 46(1)           | 35(1)           | 42(1)           | -12(1)          | -20(1)          | -1(1)           |
| N(1)  | 76(2)           | 50(1)           | 50(1)           | -1(1)           | -32(1)          | -11(1)          |
| N(2)  | 82(2)           | 52(1)           | 69(2)           | -26(1)          | -30(1)          | -12(1)          |
| N(3)  | 37(1)           | 22(1)           | 37(1)           | -4(1)           | -13(1)          | 2(1)            |
| O(1)  | 33(1)           | 37(1)           | 50(1)           | -5(1)           | -5(1)           | -3(1)           |
| O(2)  | 56(1)           | 29(1)           | 45(1)           | -10(1)          | -29(1)          | 10(1)           |
| Br(1) | 36(1)           | 75(1)           | 62(1)           | -11(1)          | -6(1)           | -18(1)          |

Table 5. Hydrogen coordinates ( $\times 10^4$ ) and isotropic displacement parameters ( $\text{\AA}^2 \times 10^3$ ) for a18075.

|        | x     | y    | z     | U(eq) |
|--------|-------|------|-------|-------|
| H(2)   | 14725 | 346  | 6271  | 49    |
| H(3)   | 12709 | -986 | 7983  | 46    |
| H(6)   | 11392 | 3495 | 5447  | 37    |
| H(9)   | 6713  | 2343 | 6732  | 39    |
| H(12A) | 8434  | 4270 | 7101  | 36    |
| H(12B) | 6820  | 3626 | 8107  | 36    |
| H(15)  | 6936  | 6087 | 8135  | 54    |
| H(16)  | 6026  | 8024 | 9062  | 63    |
| H(17)  | 6248  | 7962 | 11172 | 57    |
| H(18)  | 7398  | 5970 | 12367 | 58    |
| H(19)  | 8361  | 4031 | 11447 | 47    |
| H(3')  | 9447  | -957 | 9271  | 40    |

**CCDC 1481435 (4g)**

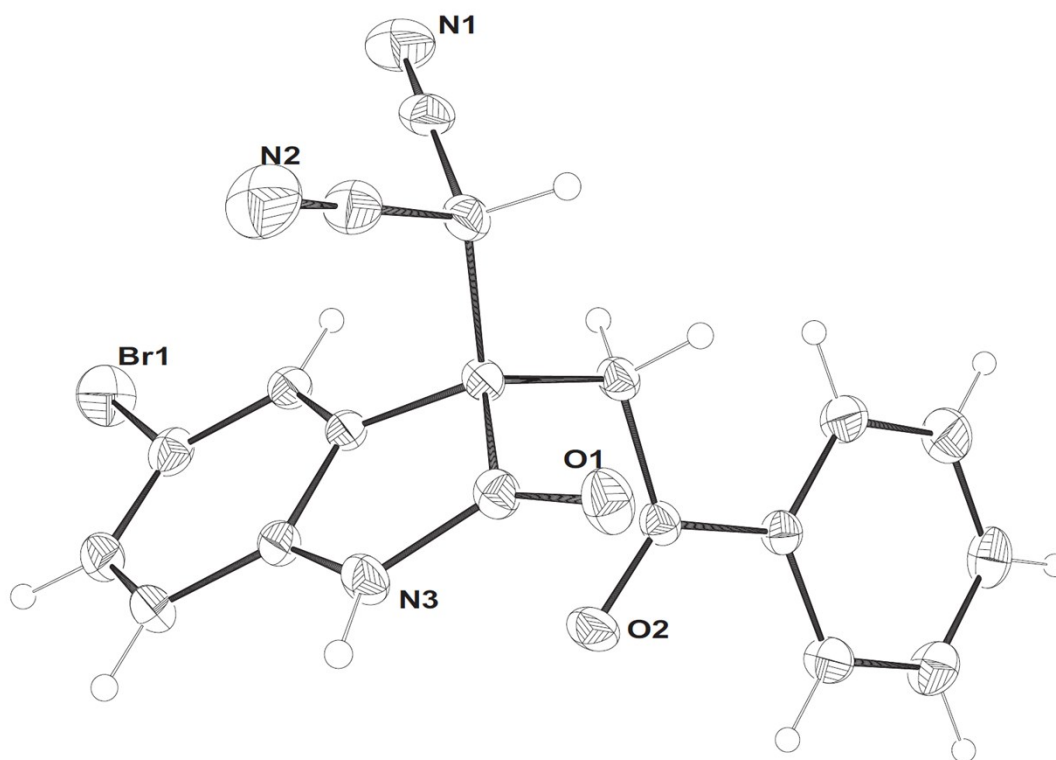



## (b) X-Ray Crystallographic Data of **5g**

Table 1. Crystal data and structure refinement for **5g**.

|                                   |                                                                    |          |
|-----------------------------------|--------------------------------------------------------------------|----------|
| Identification code               | 18074                                                              |          |
| Empirical formula                 | C <sub>19</sub> H <sub>12</sub> Br N <sub>3</sub> O <sub>2</sub> S |          |
| Formula weight                    | 426.29                                                             |          |
| Temperature                       | 200(2) K                                                           |          |
| Wavelength                        | 0.71073 Å                                                          |          |
| Crystal system                    | Orthorhombic                                                       |          |
| Space group                       | P b c a                                                            |          |
| Unit cell dimensions              | a = 11.1742(7) Å                                                   | α = 90°. |
|                                   | b = 9.5722(6) Å                                                    | β = 90°. |
|                                   | c = 34.645(2) Å                                                    | γ = 90°. |
| Volume                            | 3705.7(4) Å <sup>3</sup>                                           |          |
| Z                                 | 8                                                                  |          |
| Density (calculated)              | 1.528 Mg/m <sup>3</sup>                                            |          |
| Absorption coefficient            | 2.349 mm <sup>-1</sup>                                             |          |
| F(000)                            | 1712                                                               |          |
| Crystal size                      | 0.52 x 0.34 x 0.11 mm <sup>3</sup>                                 |          |
| Theta range for data collection   | 2.86 to 25.03°.                                                    |          |
| Index ranges                      | -11 ≤ h ≤ 13, -8 ≤ k ≤ 11, -41 ≤ l ≤ 39                            |          |
| Reflections collected             | 18717                                                              |          |
| Independent reflections           | 3277 [R(int) = 0.0307]                                             |          |
| Completeness to theta = 25.03°    | 99.9 %                                                             |          |
| Absorption correction             | multi-scan                                                         |          |
| Max. and min. transmission        | 0.7821 and 0.3747                                                  |          |
| Refinement method                 | Full-matrix least-squares on F <sup>2</sup>                        |          |
| Data / restraints / parameters    | 3277 / 0 / 235                                                     |          |
| Goodness-of-fit on F <sup>2</sup> | 1.055                                                              |          |
| Final R indices [I > 2σ(I)]       | R1 = 0.0308, wR2 = 0.0941                                          |          |
| R indices (all data)              | R1 = 0.0418, wR2 = 0.1013                                          |          |
| Largest diff. peak and hole       | 0.268 and -0.419 e.Å <sup>-3</sup>                                 |          |

Table 2. Atomic coordinates ( $\times 10^4$ ) and equivalent isotropic displacement parameters ( $\text{\AA}^2 \times 10^3$ ) for 18074.  $U(\text{eq})$  is defined as one third of the trace of the orthogonalized  $U^{ij}$  tensor.

|       | x       | y        | z       | U(eq) |
|-------|---------|----------|---------|-------|
| C(1)  | 3915(2) | 10583(3) | 5797(1) | 31(1) |
| C(2)  | 3561(2) | 10527(3) | 5416(1) | 37(1) |
| C(3)  | 3686(2) | 9298(3)  | 5208(1) | 37(1) |
| C(4)  | 4176(2) | 8157(3)  | 5396(1) | 27(1) |
| C(5)  | 4515(2) | 8223(3)  | 5783(1) | 24(1) |
| C(6)  | 4399(2) | 9447(3)  | 5989(1) | 27(1) |
| C(7)  | 5059(2) | 6832(2)  | 5897(1) | 23(1) |
| C(8)  | 5001(2) | 6006(3)  | 5510(1) | 28(1) |
| C(9)  | 6386(2) | 7032(3)  | 6019(1) | 25(1) |
| C(10) | 7078(2) | 7553(3)  | 5685(1) | 33(1) |
| C(11) | 6951(2) | 5759(3)  | 6174(1) | 32(1) |
| C(12) | 4353(2) | 5956(3)  | 6190(1) | 27(1) |
| C(13) | 4315(2) | 6502(3)  | 6598(1) | 28(1) |
| C(14) | 3569(2) | 6202(3)  | 7347(1) | 42(1) |
| C(15) | 2813(3) | 7228(3)  | 7480(1) | 52(1) |
| C(16) | 2994(3) | 7786(4)  | 7846(1) | 59(1) |
| C(17) | 3909(3) | 7320(4)  | 8073(1) | 56(1) |
| C(18) | 4653(3) | 6287(4)  | 7940(1) | 60(1) |
| C(19) | 4494(3) | 5724(4)  | 7580(1) | 56(1) |
| N(1)  | 4458(2) | 6833(2)  | 5245(1) | 31(1) |
| N(2)  | 7540(2) | 7939(3)  | 5416(1) | 51(1) |
| N(3)  | 7386(2) | 4807(3)  | 6307(1) | 50(1) |
| O(1)  | 5377(2) | 4826(2)  | 5468(1) | 38(1) |
| O(2)  | 4883(2) | 7472(2)  | 6718(1) | 40(1) |
| S(1)  | 3339(1) | 5464(1)  | 6885(1) | 51(1) |
| Br(1) | 3757(1) | 12304(1) | 6068(1) | 45(1) |

Table 3. Bond lengths [ $\text{\AA}$ ] and angles [ $^\circ$ ] for 18074.

---

|              |          |
|--------------|----------|
| C(1)-C(2)    | 1.380(4) |
| C(1)-C(6)    | 1.384(4) |
| C(1)-Br(1)   | 1.903(3) |
| C(2)-C(3)    | 1.387(4) |
| C(2)-H(2)    | 0.9500   |
| C(3)-C(4)    | 1.384(4) |
| C(3)-H(3)    | 0.9500   |
| C(4)-C(5)    | 1.395(3) |
| C(4)-N(1)    | 1.406(3) |
| C(5)-C(6)    | 1.378(3) |
| C(5)-C(7)    | 1.516(3) |
| C(6)-H(6)    | 0.9500   |
| C(7)-C(12)   | 1.535(3) |
| C(7)-C(9)    | 1.553(3) |
| C(7)-C(8)    | 1.558(3) |
| C(8)-O(1)    | 1.214(3) |
| C(8)-N(1)    | 1.355(3) |
| C(9)-C(11)   | 1.474(4) |
| C(9)-C(10)   | 1.478(4) |
| C(9)-H(9)    | 1.0000   |
| C(10)-N(2)   | 1.127(3) |
| C(11)-N(3)   | 1.132(3) |
| C(12)-C(13)  | 1.508(3) |
| C(12)-H(12A) | 0.9900   |
| C(12)-H(12B) | 0.9900   |
| C(13)-O(2)   | 1.200(3) |
| C(13)-S(1)   | 1.780(2) |
| C(14)-C(15)  | 1.375(4) |
| C(14)-C(19)  | 1.388(4) |
| C(14)-S(1)   | 1.768(3) |
| C(15)-C(16)  | 1.390(4) |
| C(15)-H(15)  | 0.9500   |
| C(16)-C(17)  | 1.364(5) |
| C(16)-H(16)  | 0.9500   |
| C(17)-C(18)  | 1.371(5) |
| C(17)-H(17)  | 0.9500   |

|                  |            |
|------------------|------------|
| C(18)-C(19)      | 1.371(5)   |
| C(18)-H(18)      | 0.9500     |
| C(19)-H(19)      | 0.9500     |
| N(1)-H(1)        | 0.9414     |
| C(2)-C(1)-C(6)   | 122.7(2)   |
| C(2)-C(1)-Br(1)  | 118.6(2)   |
| C(6)-C(1)-Br(1)  | 118.67(19) |
| C(1)-C(2)-C(3)   | 120.1(2)   |
| C(1)-C(2)-H(2)   | 119.9      |
| C(3)-C(2)-H(2)   | 119.9      |
| C(4)-C(3)-C(2)   | 117.7(2)   |
| C(4)-C(3)-H(3)   | 121.1      |
| C(2)-C(3)-H(3)   | 121.1      |
| C(3)-C(4)-C(5)   | 121.5(2)   |
| C(3)-C(4)-N(1)   | 128.8(2)   |
| C(5)-C(4)-N(1)   | 109.6(2)   |
| C(6)-C(5)-C(4)   | 120.8(2)   |
| C(6)-C(5)-C(7)   | 130.4(2)   |
| C(4)-C(5)-C(7)   | 108.6(2)   |
| C(5)-C(6)-C(1)   | 117.1(2)   |
| C(5)-C(6)-H(6)   | 121.4      |
| C(1)-C(6)-H(6)   | 121.4      |
| C(5)-C(7)-C(12)  | 116.52(19) |
| C(5)-C(7)-C(9)   | 110.2(2)   |
| C(12)-C(7)-C(9)  | 112.18(19) |
| C(5)-C(7)-C(8)   | 101.83(18) |
| C(12)-C(7)-C(8)  | 105.66(19) |
| C(9)-C(7)-C(8)   | 109.65(18) |
| O(1)-C(8)-N(1)   | 128.1(2)   |
| O(1)-C(8)-C(7)   | 124.2(2)   |
| N(1)-C(8)-C(7)   | 107.7(2)   |
| C(11)-C(9)-C(10) | 109.8(2)   |
| C(11)-C(9)-C(7)  | 114.0(2)   |
| C(10)-C(9)-C(7)  | 109.16(19) |
| C(11)-C(9)-H(9)  | 107.9      |
| C(10)-C(9)-H(9)  | 107.9      |
| C(7)-C(9)-H(9)   | 107.9      |

|                     |            |
|---------------------|------------|
| N(2)-C(10)-C(9)     | 175.5(3)   |
| N(3)-C(11)-C(9)     | 177.1(3)   |
| C(13)-C(12)-C(7)    | 116.5(2)   |
| C(13)-C(12)-H(12A)  | 108.2      |
| C(7)-C(12)-H(12A)   | 108.2      |
| C(13)-C(12)-H(12B)  | 108.2      |
| C(7)-C(12)-H(12B)   | 108.2      |
| H(12A)-C(12)-H(12B) | 107.3      |
| O(2)-C(13)-C(12)    | 125.3(2)   |
| O(2)-C(13)-S(1)     | 124.23(19) |
| C(12)-C(13)-S(1)    | 110.42(17) |
| C(15)-C(14)-C(19)   | 119.9(3)   |
| C(15)-C(14)-S(1)    | 119.9(2)   |
| C(19)-C(14)-S(1)    | 120.1(2)   |
| C(14)-C(15)-C(16)   | 119.3(3)   |
| C(14)-C(15)-H(15)   | 120.3      |
| C(16)-C(15)-H(15)   | 120.3      |
| C(17)-C(16)-C(15)   | 120.6(3)   |
| C(17)-C(16)-H(16)   | 119.7      |
| C(15)-C(16)-H(16)   | 119.7      |
| C(16)-C(17)-C(18)   | 119.8(3)   |
| C(16)-C(17)-H(17)   | 120.1      |
| C(18)-C(17)-H(17)   | 120.1      |
| C(19)-C(18)-C(17)   | 120.7(3)   |
| C(19)-C(18)-H(18)   | 119.7      |
| C(17)-C(18)-H(18)   | 119.7      |
| C(18)-C(19)-C(14)   | 119.7(3)   |
| C(18)-C(19)-H(19)   | 120.2      |
| C(14)-C(19)-H(19)   | 120.2      |
| C(8)-N(1)-C(4)      | 112.11(19) |
| C(8)-N(1)-H(1)      | 119.8      |
| C(4)-N(1)-H(1)      | 128.1      |
| C(14)-S(1)-C(13)    | 101.22(13) |

---

Symmetry transformations used to generate equivalent atoms:

Table 4. Anisotropic displacement parameters ( $\text{\AA}^2 \times 10^3$ ) for 18074. The anisotropic displacement factor exponent takes the form:  $-2\pi^2 [ h^2 a^{*2} U^{11} + \dots + 2 h k a^* b^* U^{12} ]$

|       | $U^{11}$ | $U^{22}$ | $U^{33}$ | $U^{23}$ | $U^{13}$ | $U^{12}$ |
|-------|----------|----------|----------|----------|----------|----------|
| C(1)  | 34(1)    | 22(1)    | 35(1)    | -1(1)    | 1(1)     | -3(1)    |
| C(2)  | 38(2)    | 32(2)    | 40(2)    | 8(1)     | -7(1)    | 2(1)     |
| C(3)  | 44(2)    | 40(2)    | 26(1)    | 5(1)     | -7(1)    | 4(1)     |
| C(4)  | 30(1)    | 29(1)    | 23(1)    | -1(1)    | -1(1)    | -2(1)    |
| C(5)  | 28(1)    | 25(1)    | 19(1)    | -1(1)    | 1(1)     | -2(1)    |
| C(6)  | 29(1)    | 26(1)    | 24(1)    | -2(1)    | 1(1)     | -2(1)    |
| C(7)  | 31(1)    | 21(1)    | 18(1)    | -4(1)    | -1(1)    | 0(1)     |
| C(8)  | 35(1)    | 28(1)    | 20(1)    | -5(1)    | -1(1)    | 0(1)     |
| C(9)  | 30(1)    | 29(1)    | 17(1)    | -2(1)    | -1(1)    | -2(1)    |
| C(10) | 34(1)    | 41(2)    | 24(1)    | -6(1)    | 0(1)     | -5(1)    |
| C(11) | 37(1)    | 35(2)    | 24(1)    | -9(1)    | -4(1)    | 4(1)     |
| C(12) | 33(1)    | 23(1)    | 24(1)    | -1(1)    | 1(1)     | -6(1)    |
| C(13) | 33(1)    | 27(1)    | 23(1)    | 4(1)     | 3(1)     | 0(1)     |
| C(14) | 49(2)    | 53(2)    | 23(1)    | 9(1)     | 7(1)     | -11(1)   |
| C(15) | 56(2)    | 62(2)    | 37(2)    | 6(2)     | -7(1)    | 3(2)     |
| C(16) | 68(2)    | 72(2)    | 38(2)    | -5(2)    | 3(2)     | 11(2)    |
| C(17) | 61(2)    | 78(3)    | 28(2)    | 2(2)     | 0(1)     | -13(2)   |
| C(18) | 53(2)    | 96(3)    | 32(2)    | 8(2)     | -5(1)    | 11(2)    |
| C(19) | 53(2)    | 77(2)    | 37(2)    | 6(2)     | 8(1)     | 12(2)    |
| N(1)  | 42(1)    | 31(1)    | 18(1)    | -6(1)    | -7(1)    | 2(1)     |
| N(2)  | 52(2)    | 72(2)    | 28(1)    | -5(1)    | 9(1)     | -20(1)   |
| N(3)  | 63(2)    | 44(2)    | 42(1)    | -7(1)    | -14(1)   | 19(1)    |
| O(1)  | 58(1)    | 30(1)    | 26(1)    | -9(1)    | -7(1)    | 7(1)     |
| O(2)  | 59(1)    | 36(1)    | 24(1)    | -6(1)    | 8(1)     | -16(1)   |
| S(1)  | 65(1)    | 58(1)    | 29(1)    | 5(1)     | 7(1)     | -28(1)   |
| Br(1) | 52(1)    | 21(1)    | 60(1)    | -6(1)    | -6(1)    | 1(1)     |

Table 5. Hydrogen coordinates ( $\times 10^4$ ) and isotropic displacement parameters ( $\text{\AA}^2 \times 10^3$ ) for 18074.

|        | x    | y     | z    | U(eq) |
|--------|------|-------|------|-------|
| H(2)   | 3231 | 11331 | 5296 | 44    |
| H(3)   | 3444 | 9241  | 4946 | 44    |
| H(6)   | 4640 | 9507  | 6251 | 32    |
| H(1)   | 4338 | 6501  | 4992 | 33    |
| H(9)   | 6411 | 7763  | 6225 | 30    |
| H(12A) | 3520 | 5867  | 6096 | 32    |
| H(12B) | 4703 | 5006  | 6195 | 32    |
| H(15)  | 2173 | 7553  | 7323 | 62    |
| H(16)  | 2477 | 8498  | 7939 | 71    |
| H(17)  | 4030 | 7710  | 8322 | 67    |
| H(18)  | 5285 | 5958  | 8099 | 72    |
| H(19)  | 5015 | 5010  | 7489 | 67    |

CCDC 1481433 (5g)

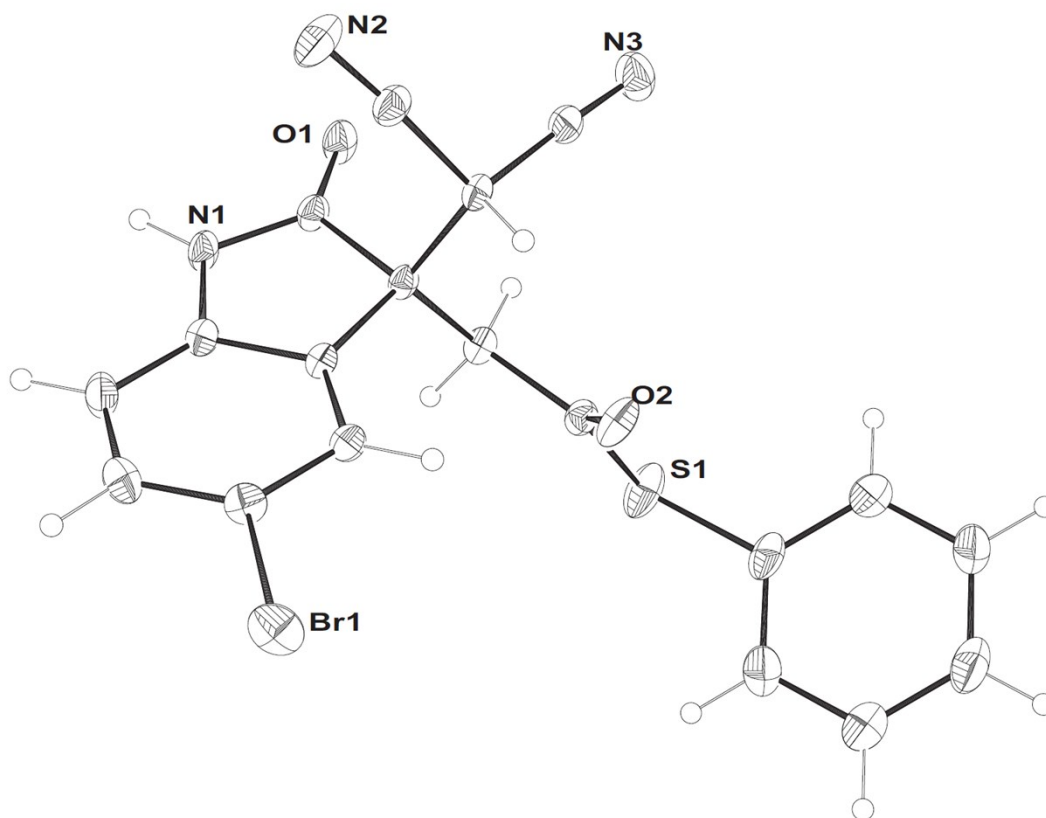

## 2. Copies of NMR Spectra of Products 4 and 5

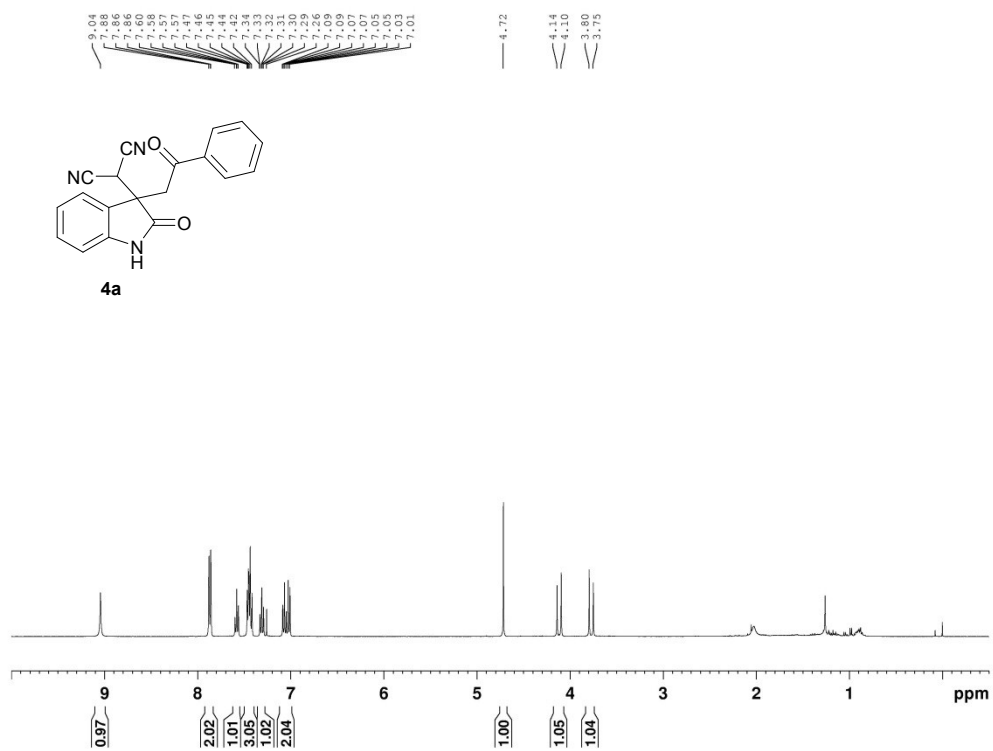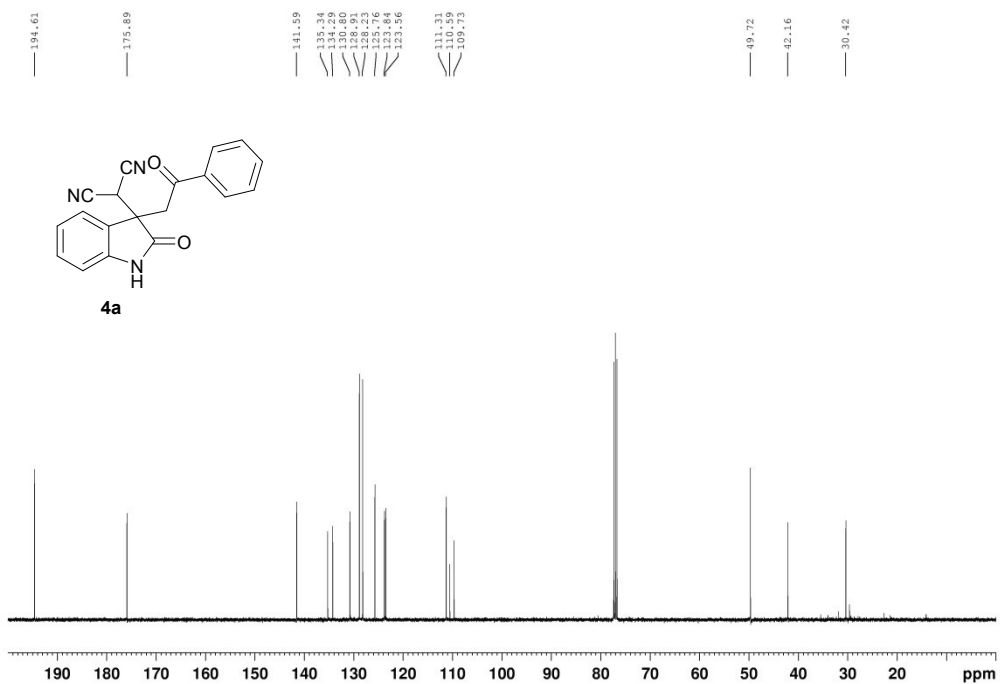



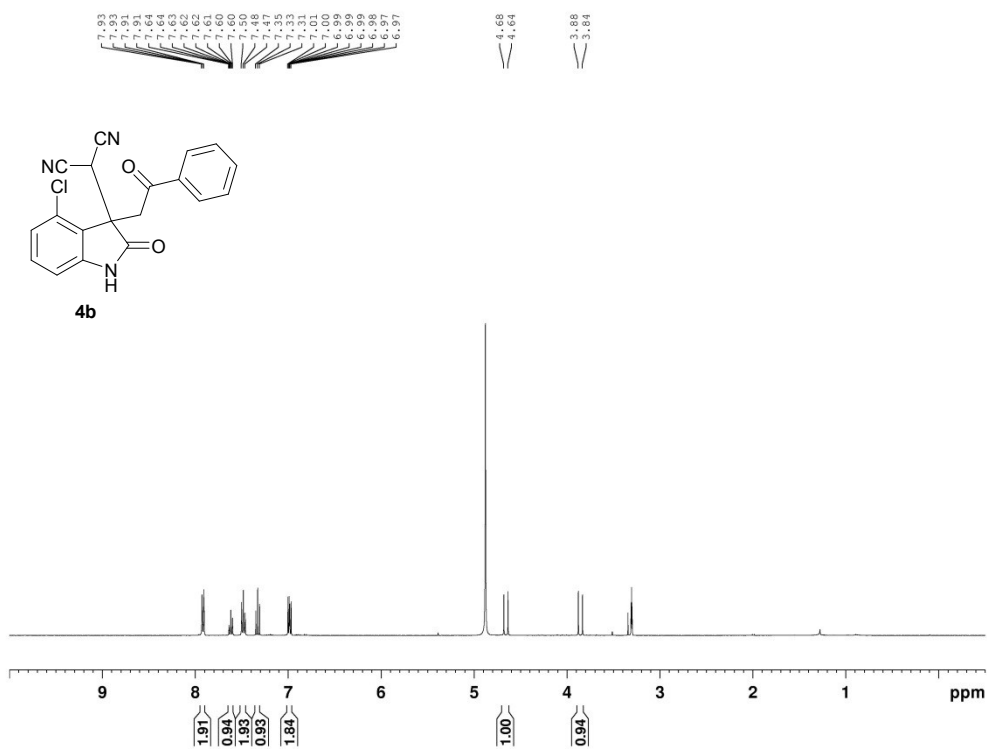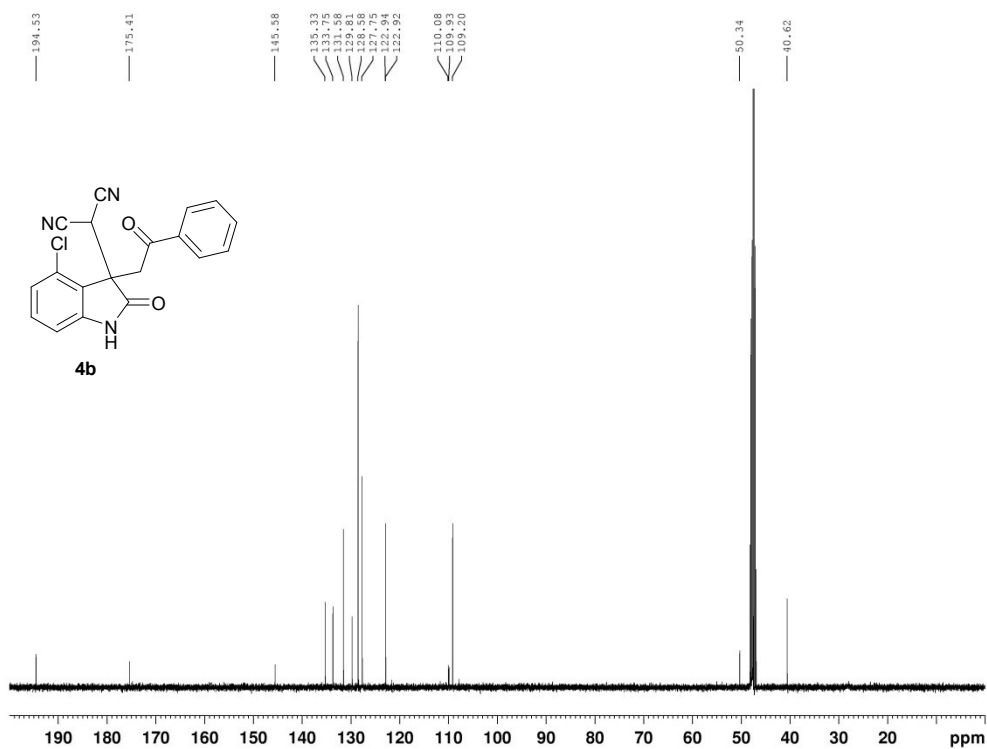



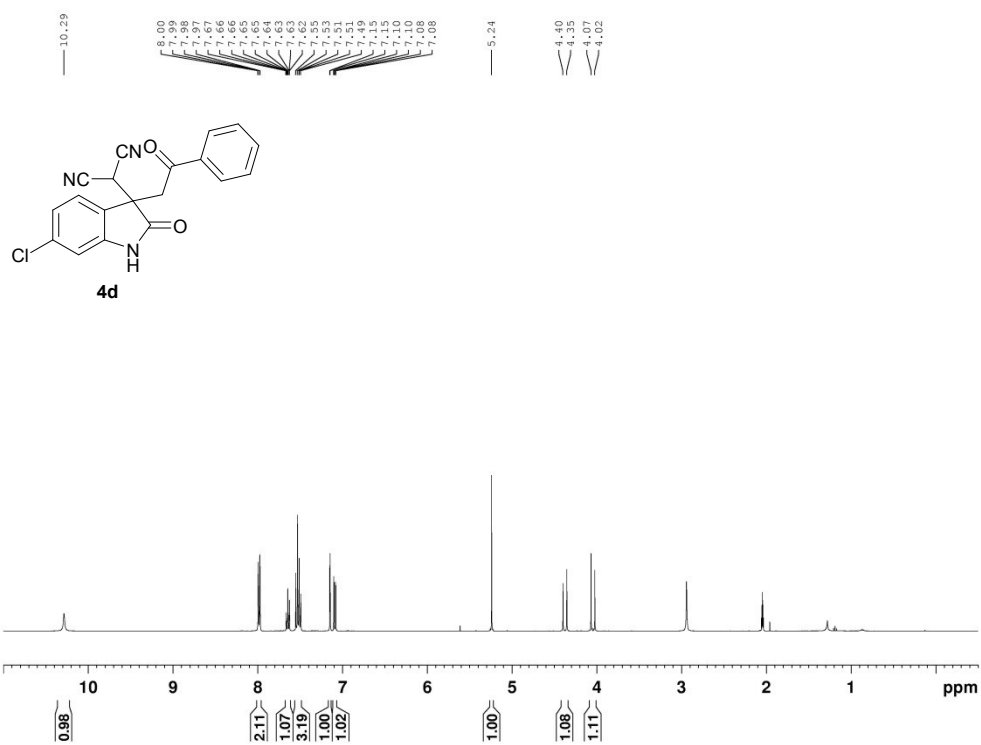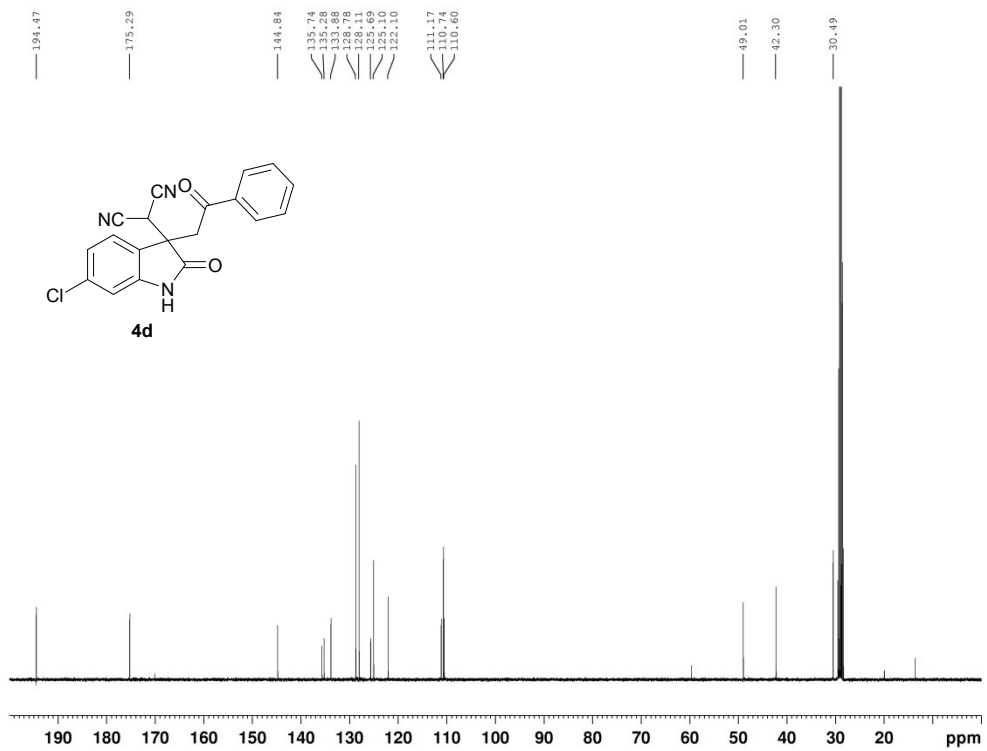

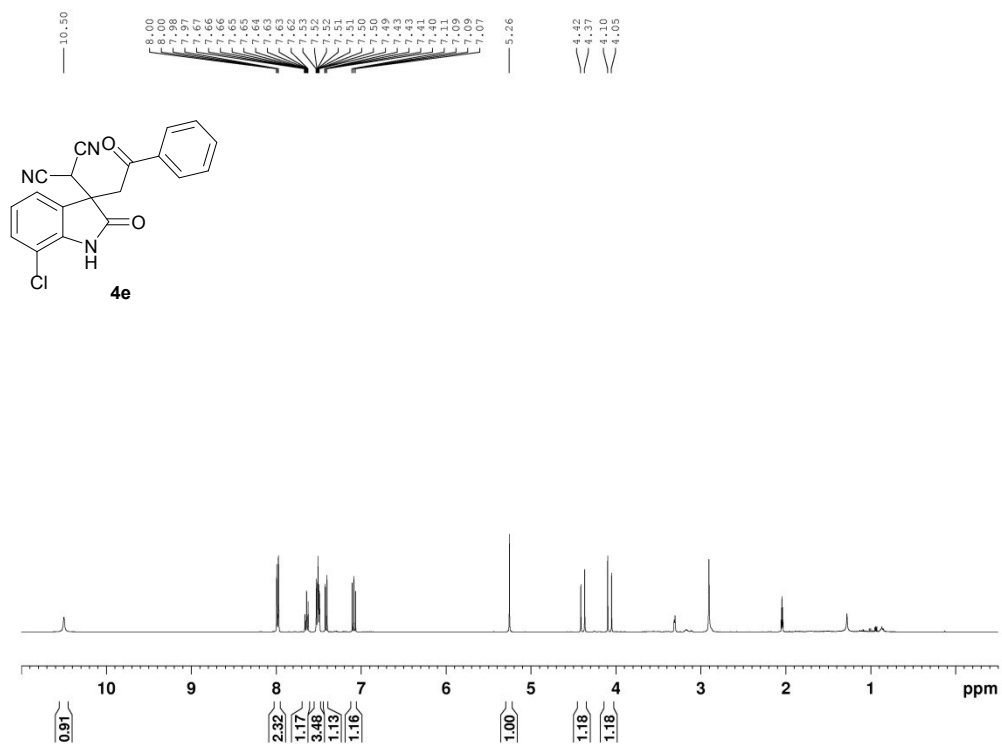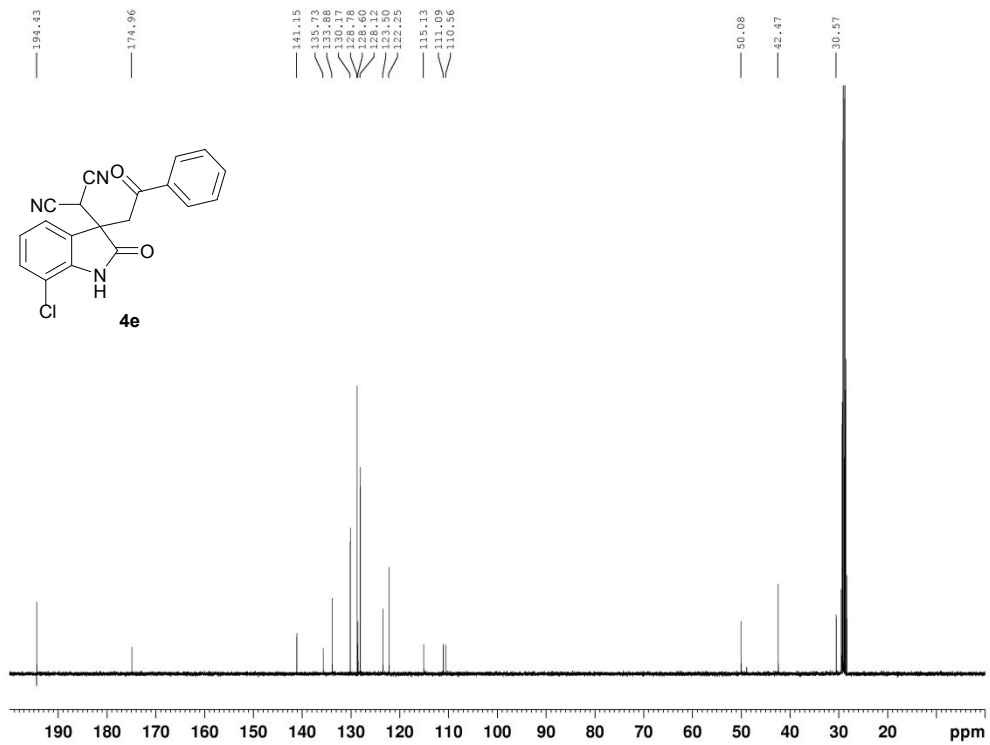

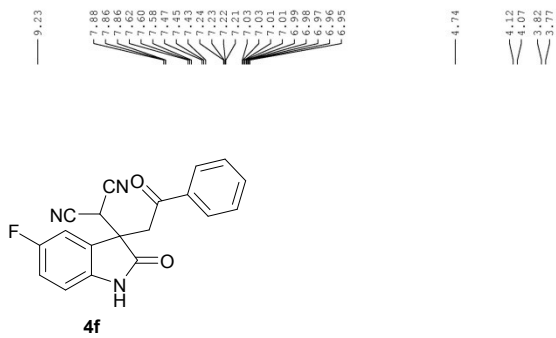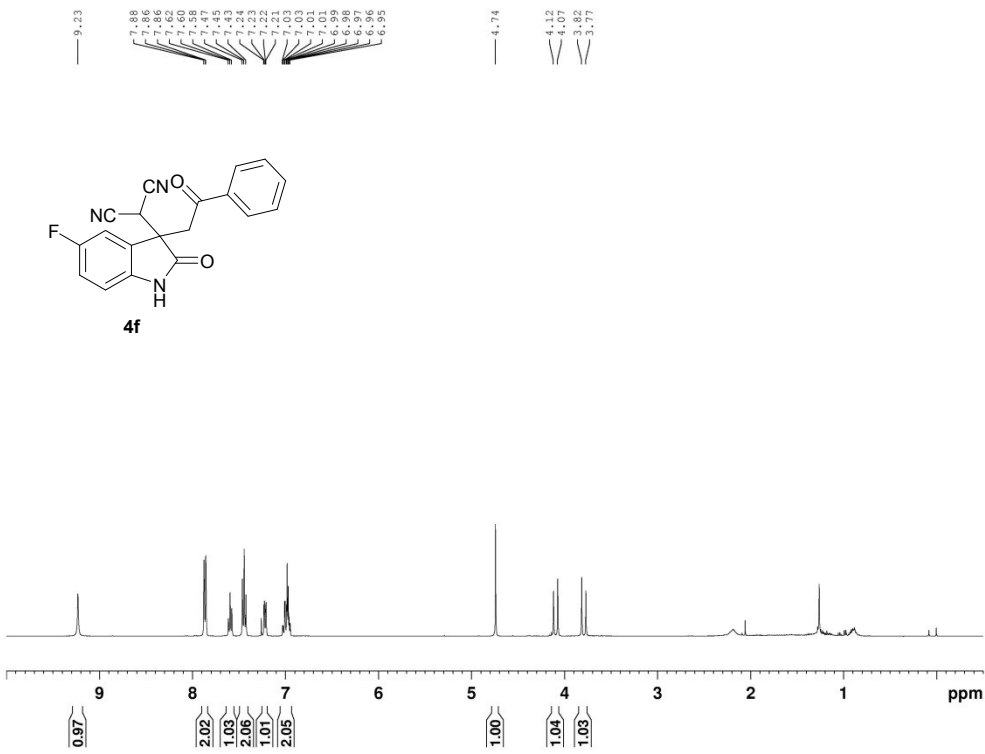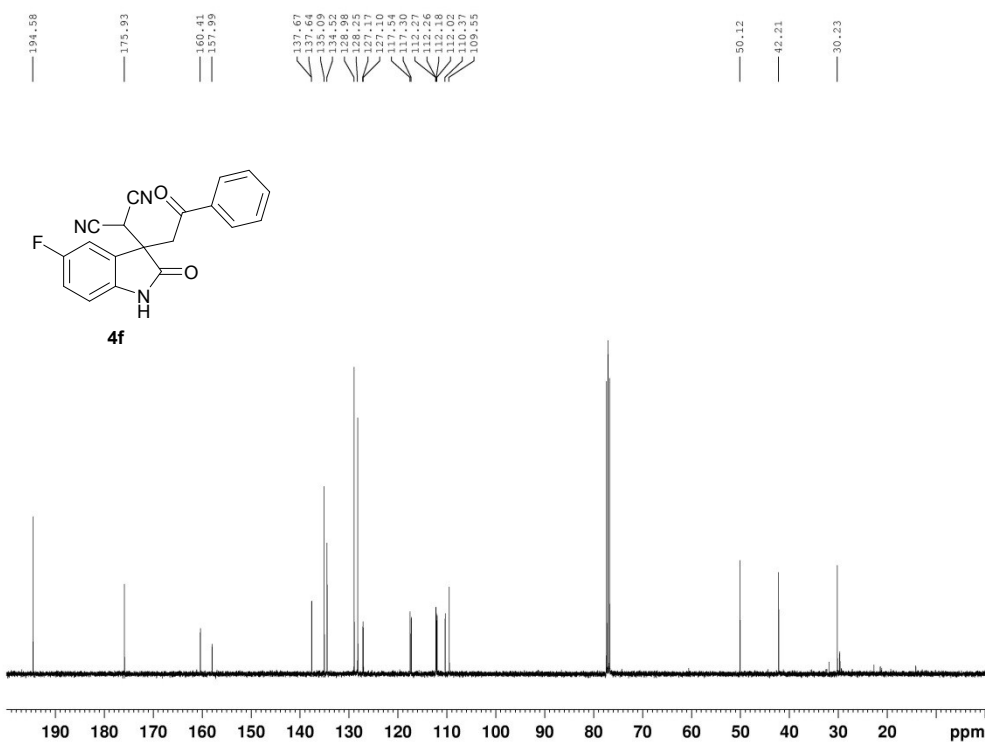

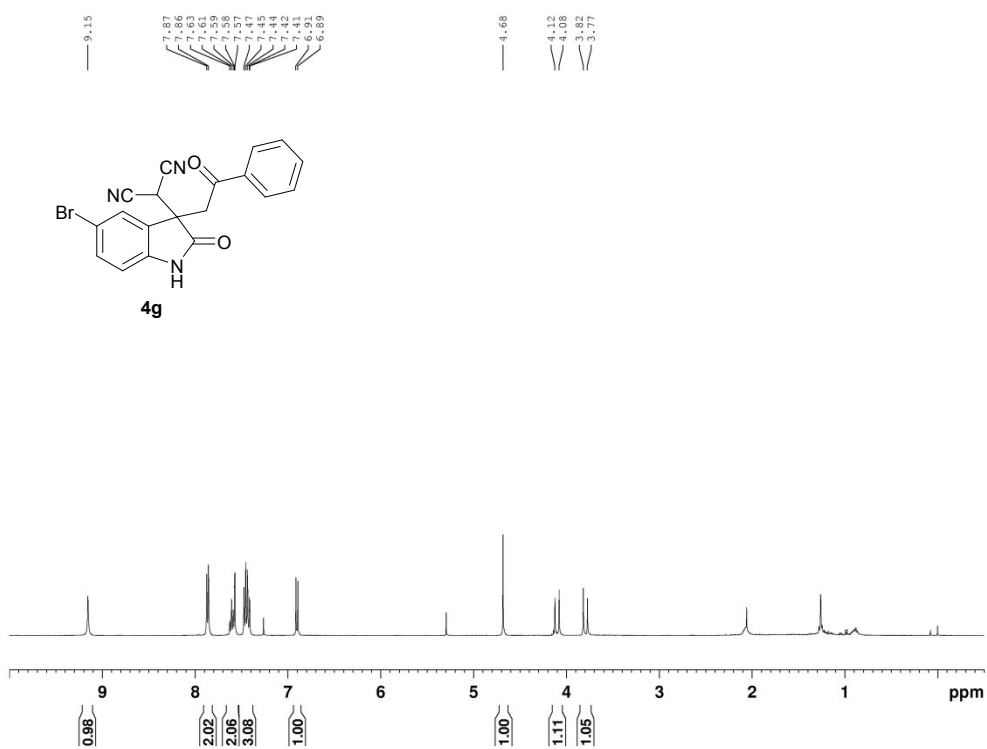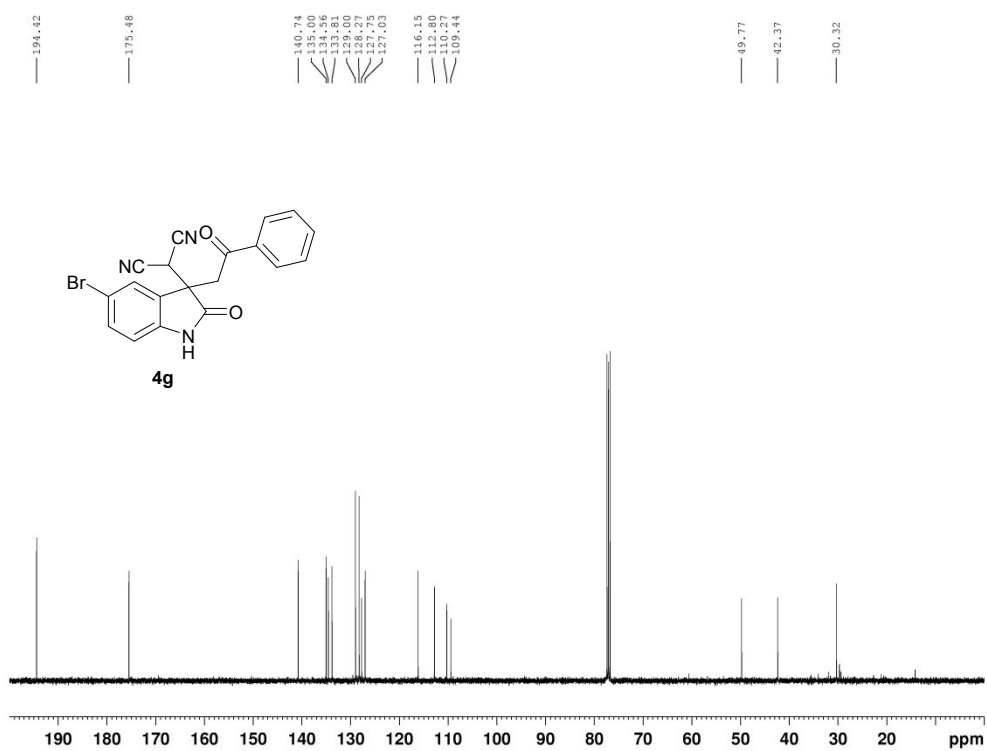

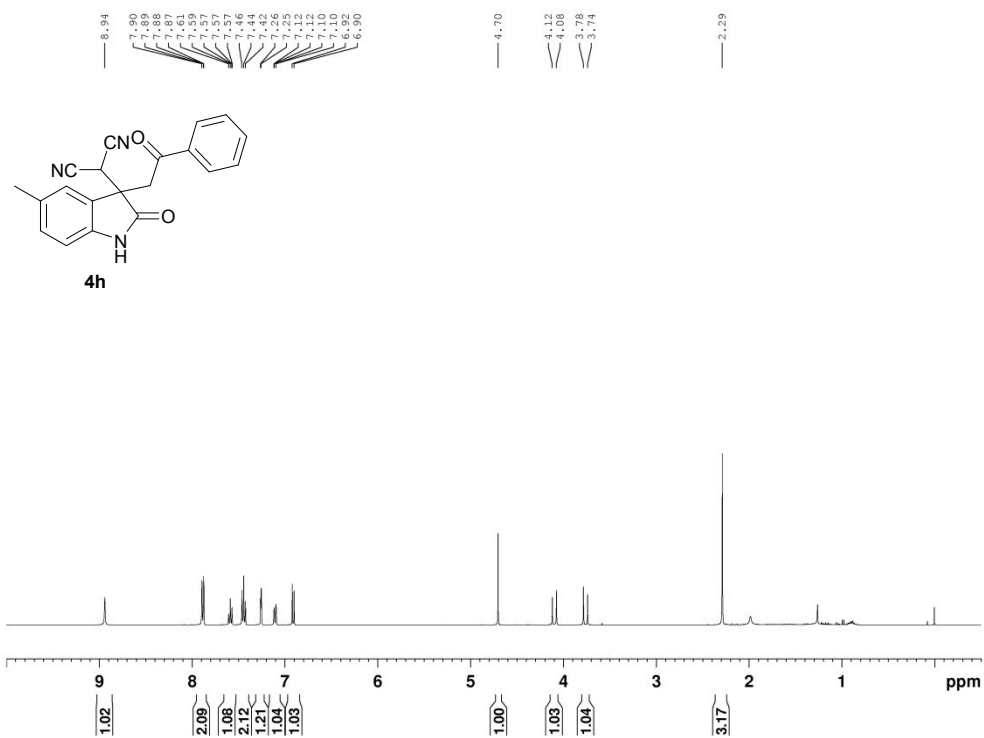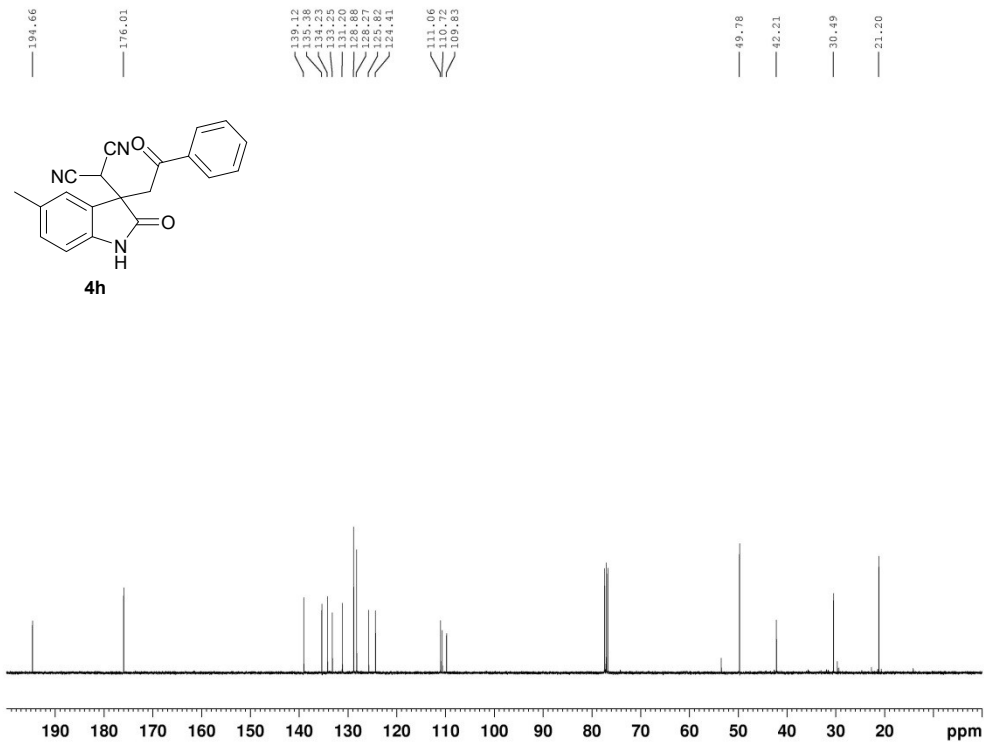

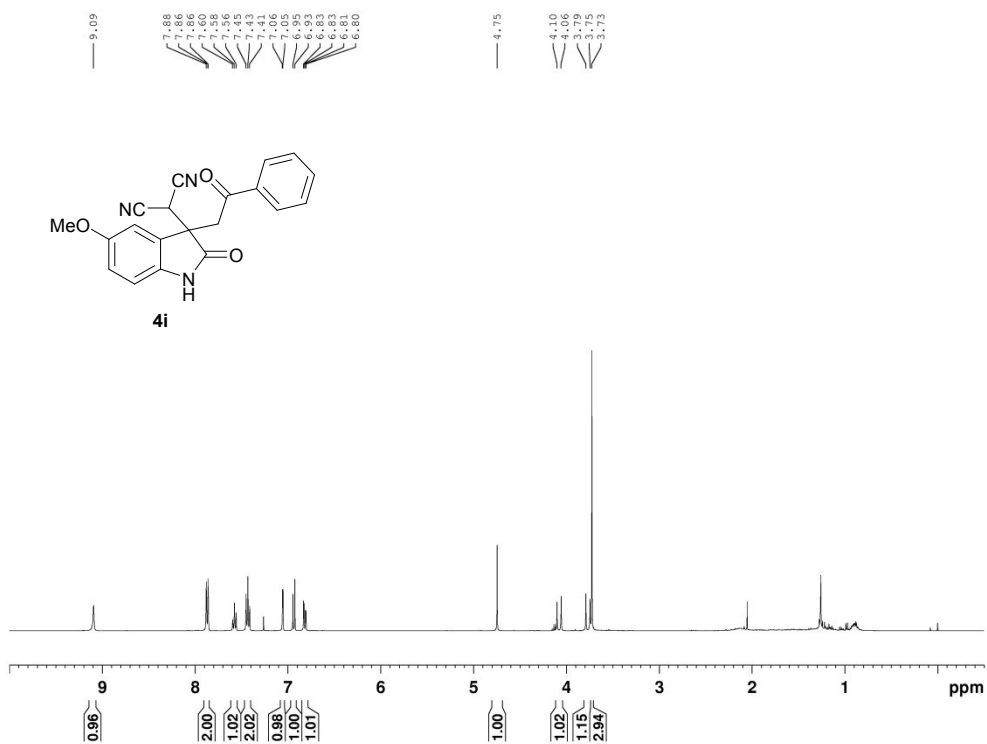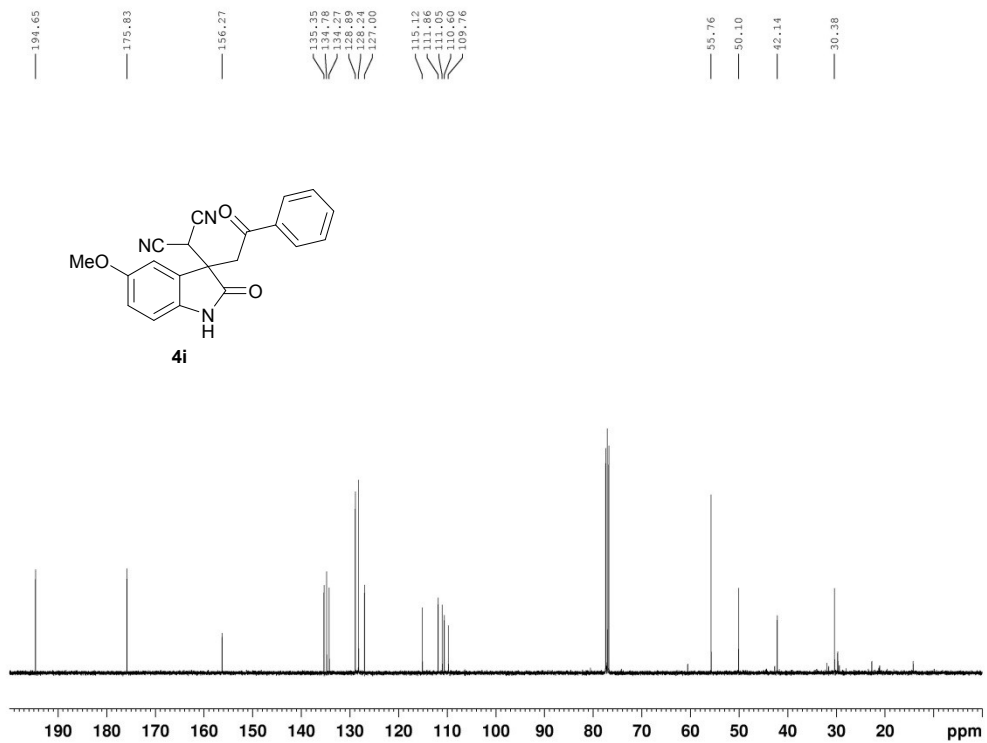



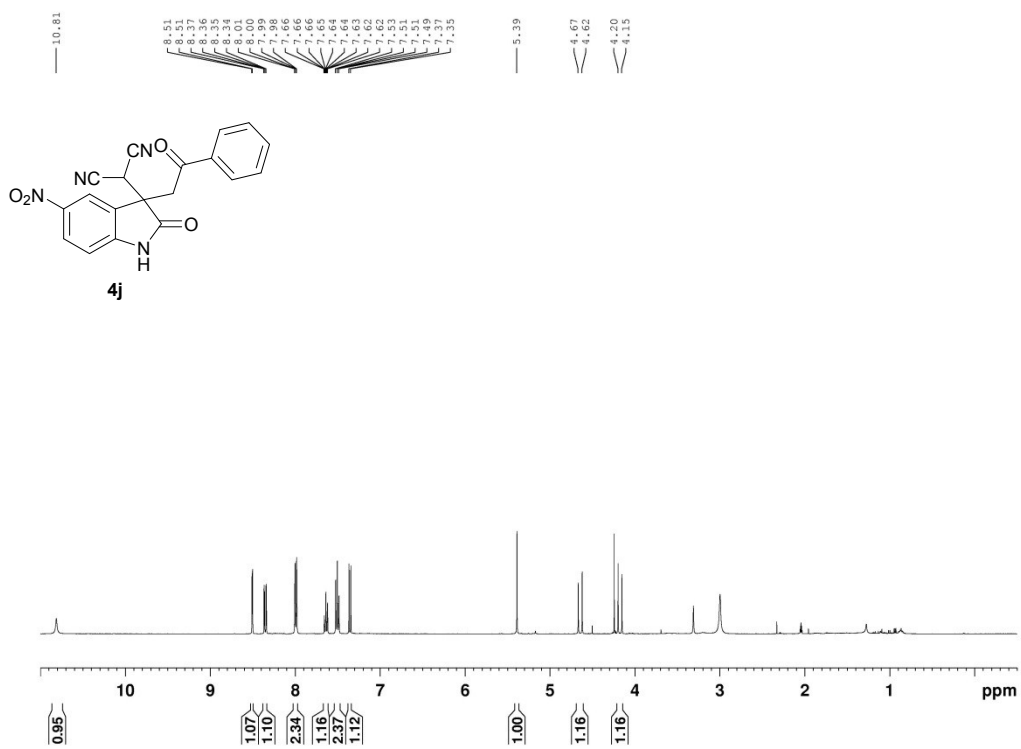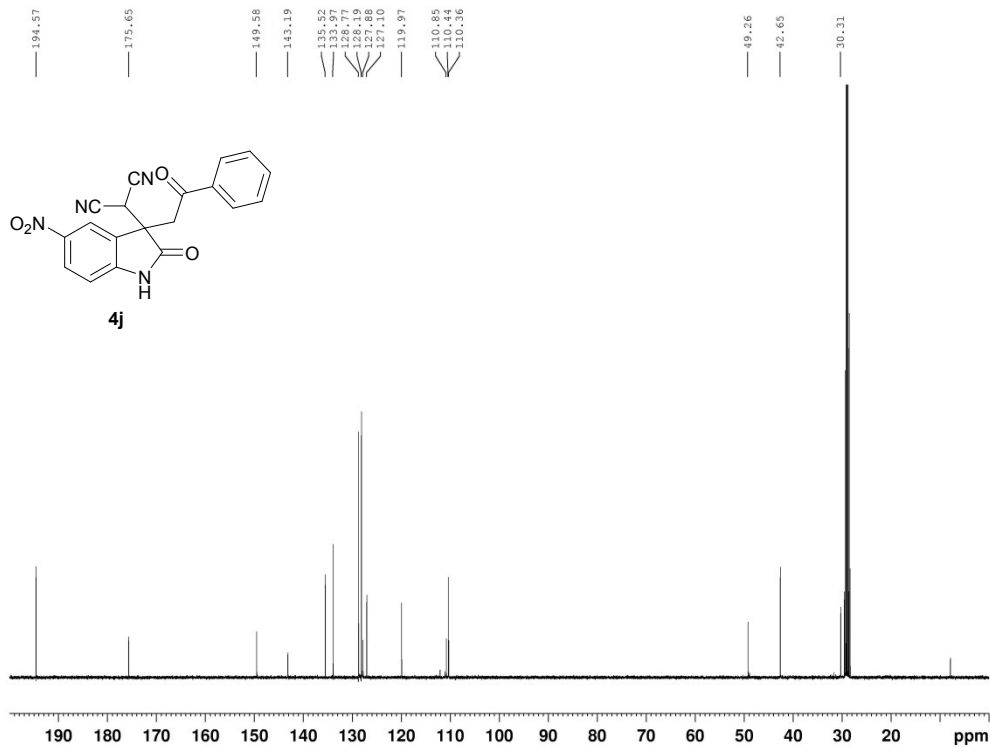

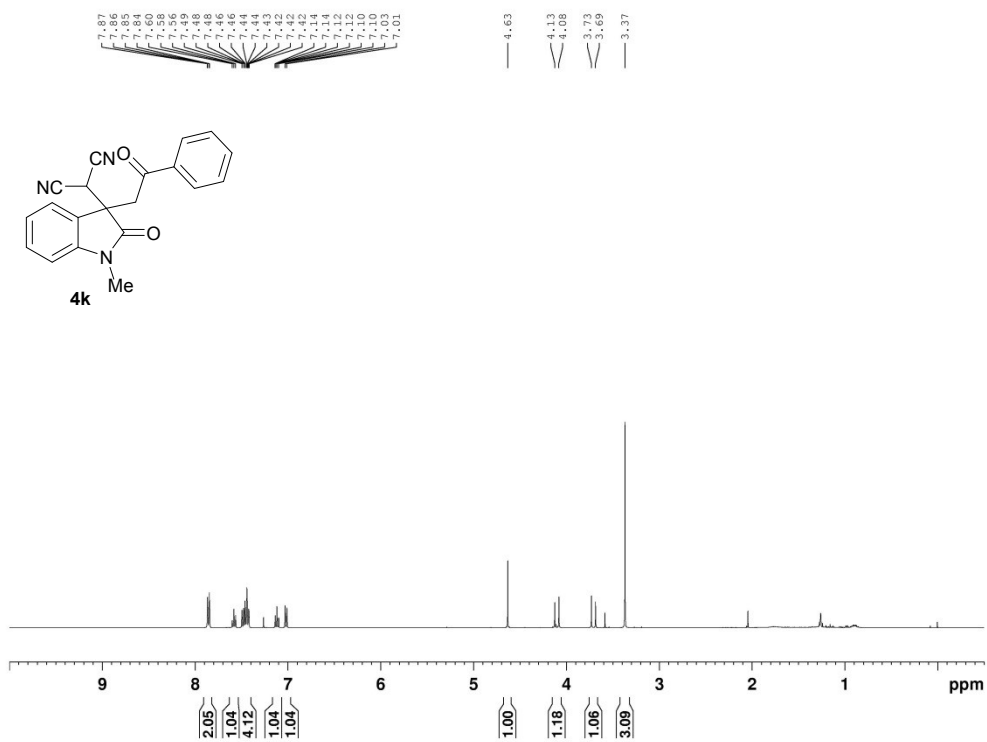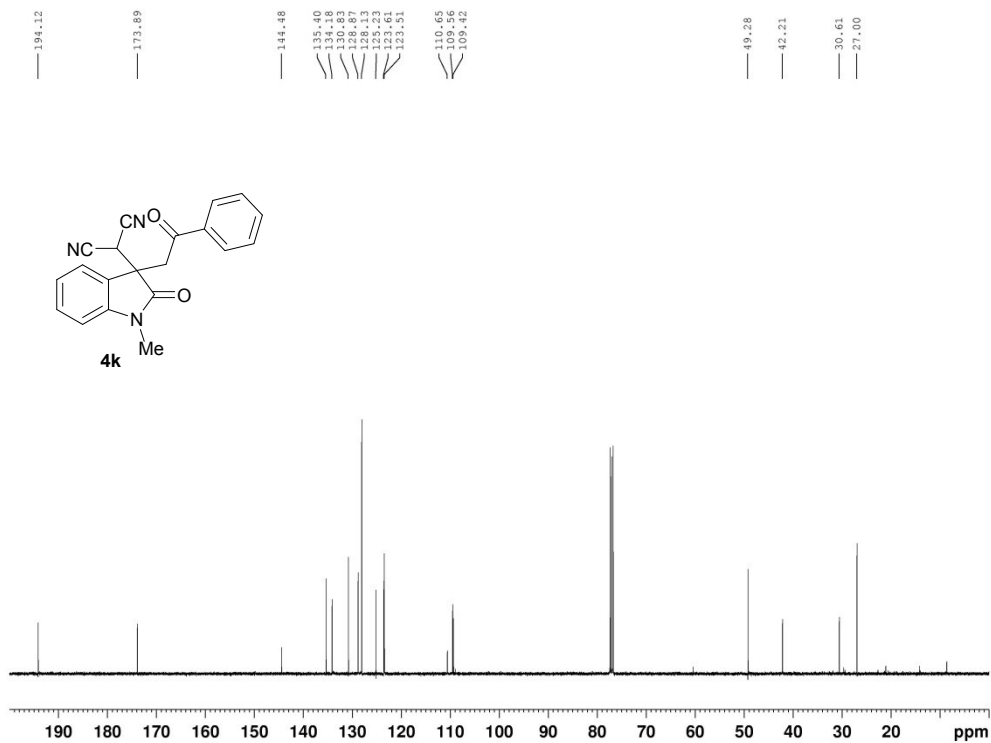

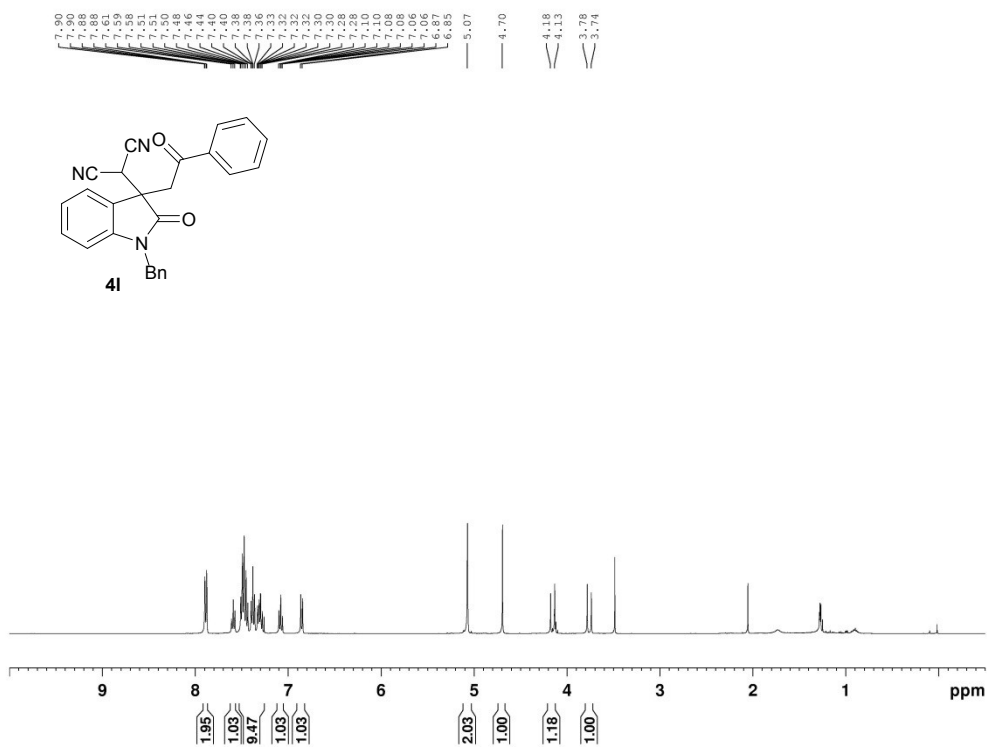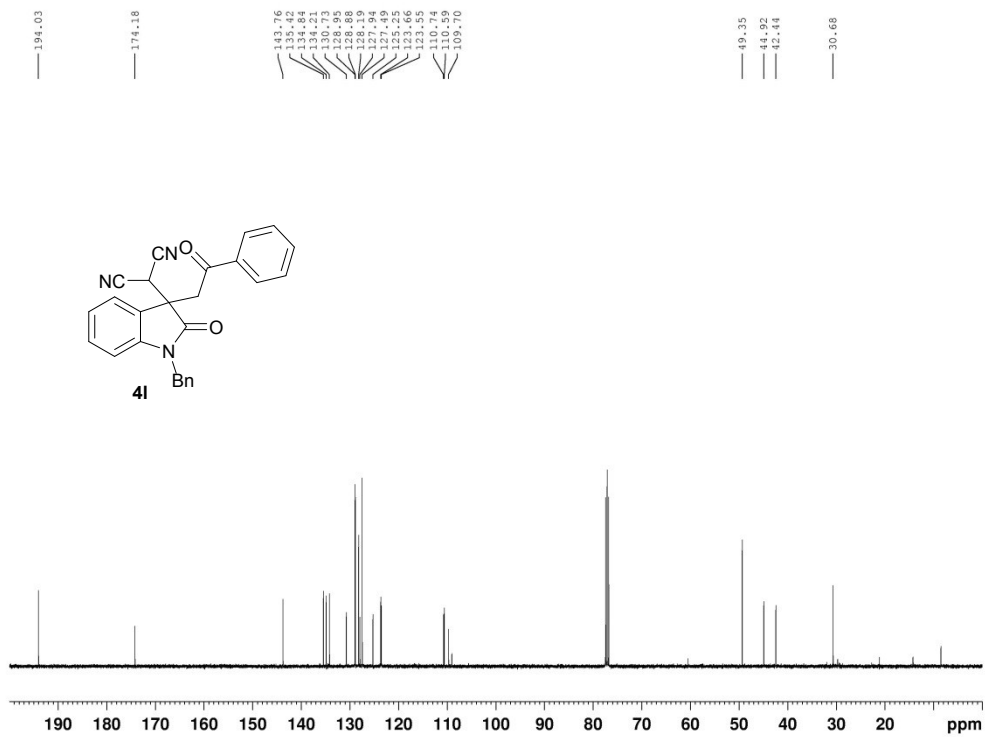

7.58  
7.57  
7.56  
7.55  
7.50  
7.48  
7.46  
7.44  
7.42  
7.40  
7.38  
7.38  
7.33  
7.11  
7.11  
7.09  
7.03  
7.01  
7.00  
5.97  
5.96  
5.95  
5.94  
5.93  
5.92  
5.91  
5.89  
5.51  
5.47  
5.34  
5.34  
5.31  
5.31  
4.62  
4.56  
4.55  
4.55  
4.54  
4.52  
4.52  
4.51  
4.50  
4.50  
4.48  
4.48  
4.47  
4.47  
4.46  
4.44  
4.43  
4.43  
4.43  
4.42  
4.41  
4.10  
3.74  
3.69

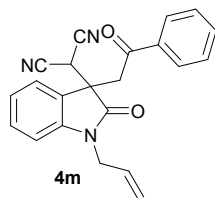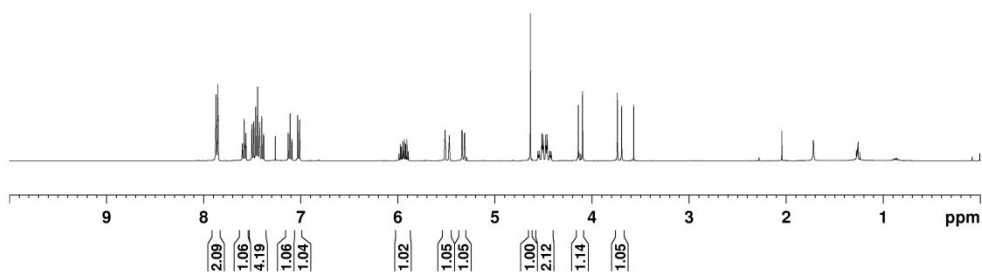

193.97  
173.72  
143.76  
135.42  
134.16  
130.70  
128.85  
128.15  
123.56  
123.50  
118.58  
110.68  
110.41  
109.56  
49.23  
43.31  
42.37  
30.70

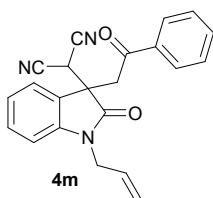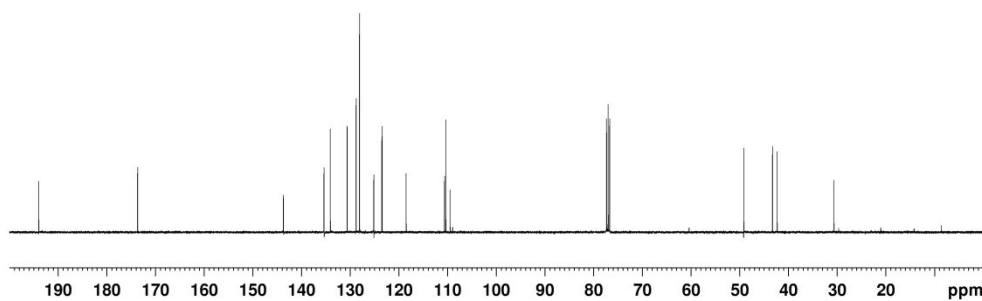

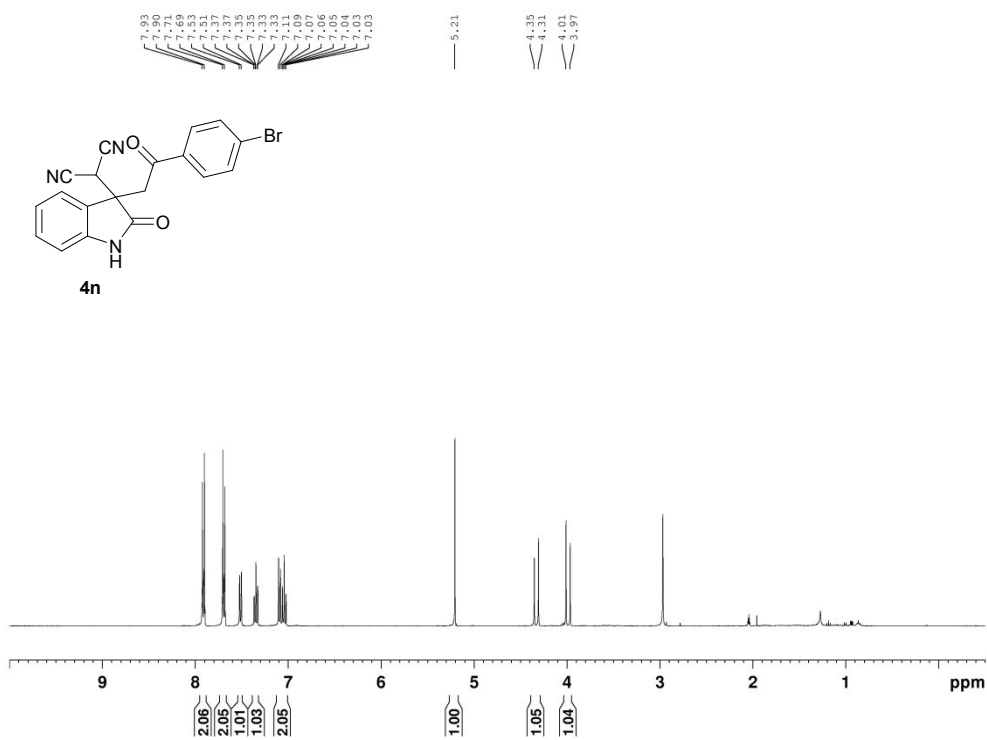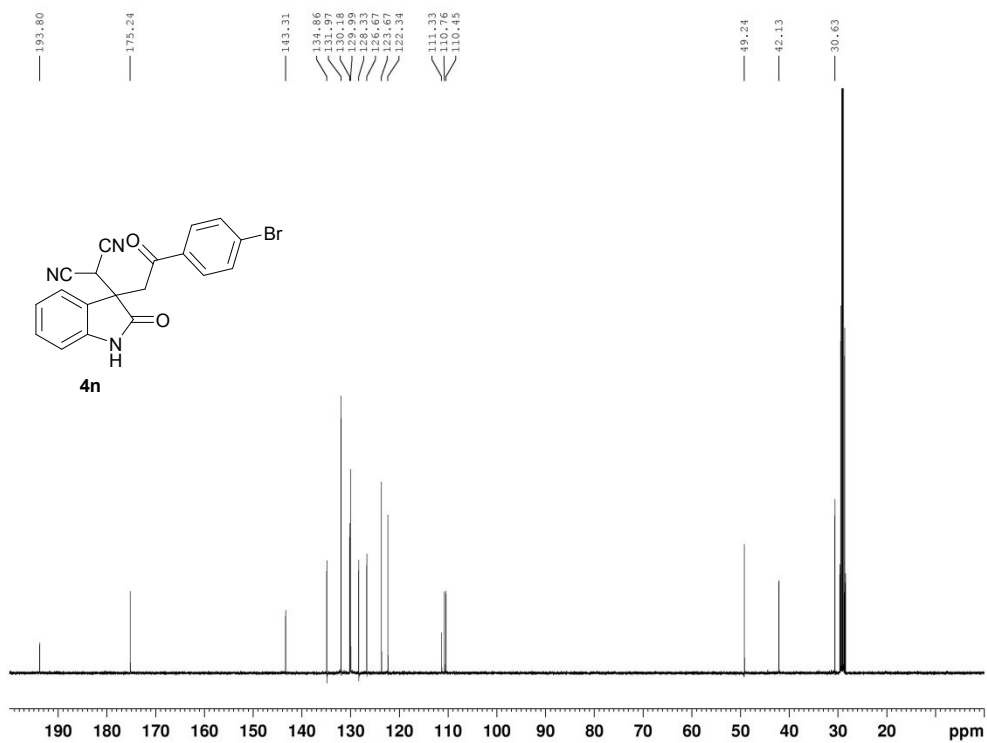

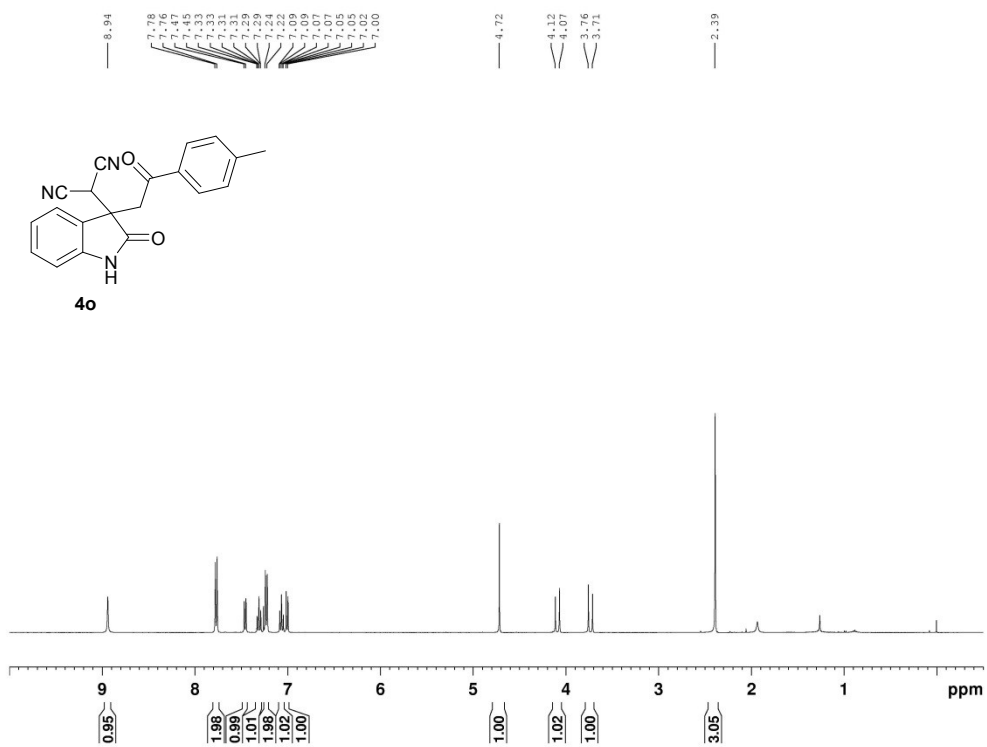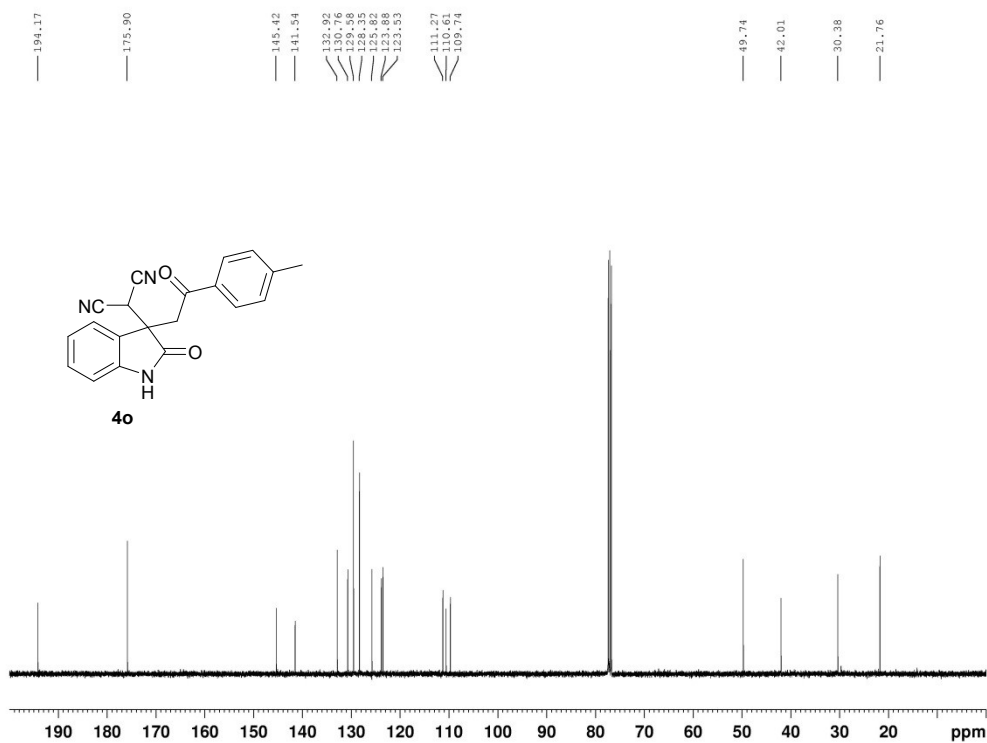

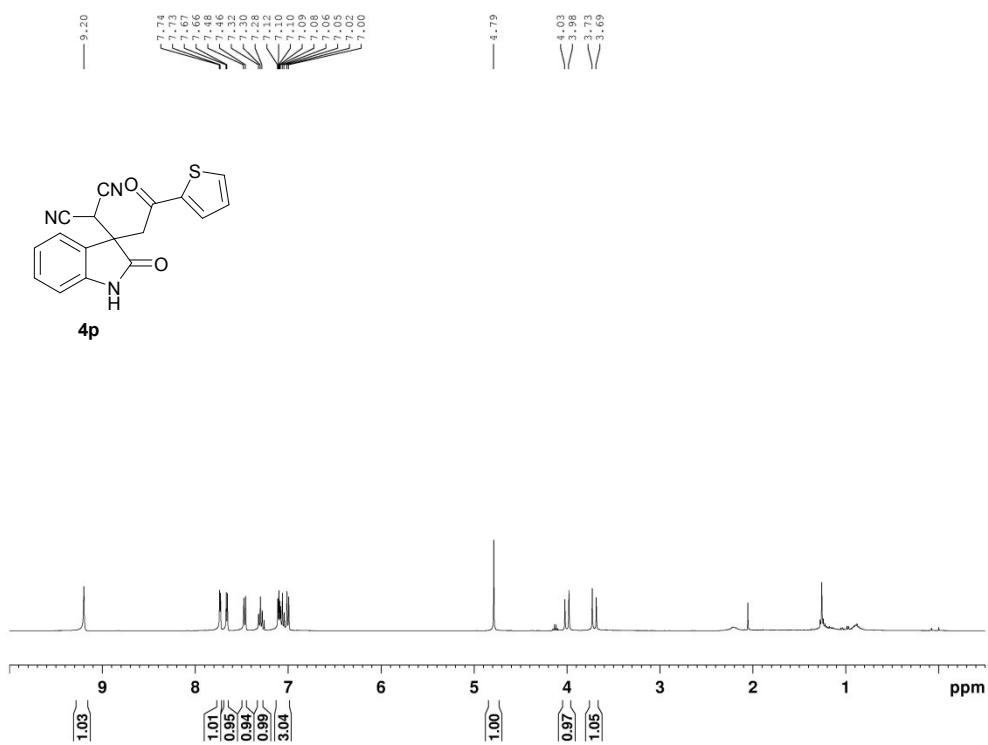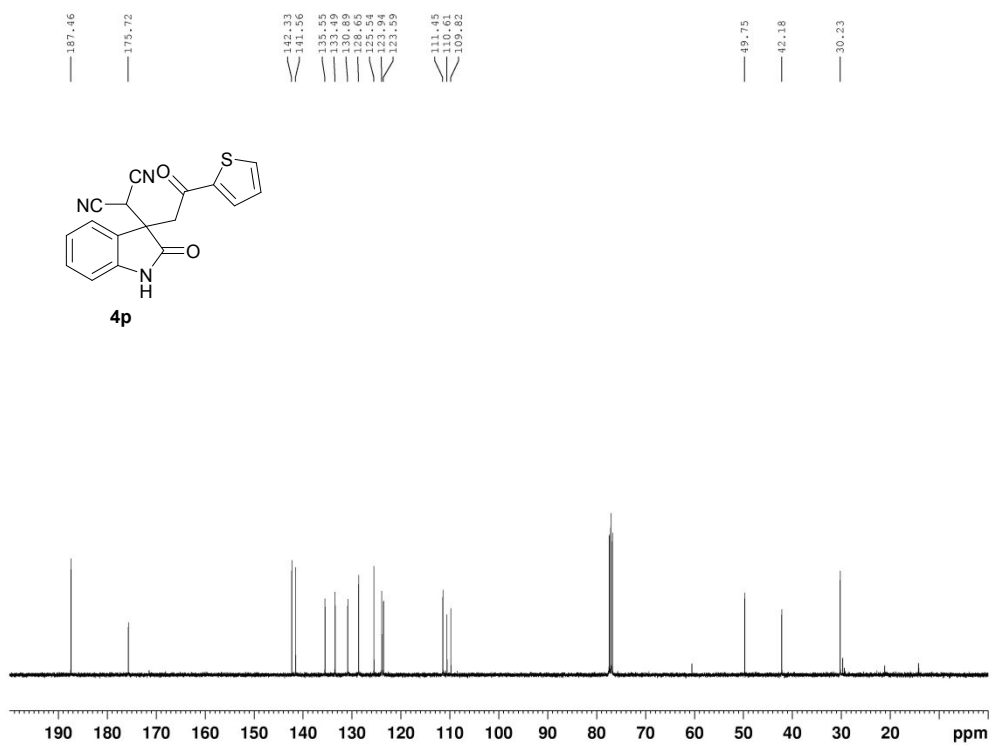

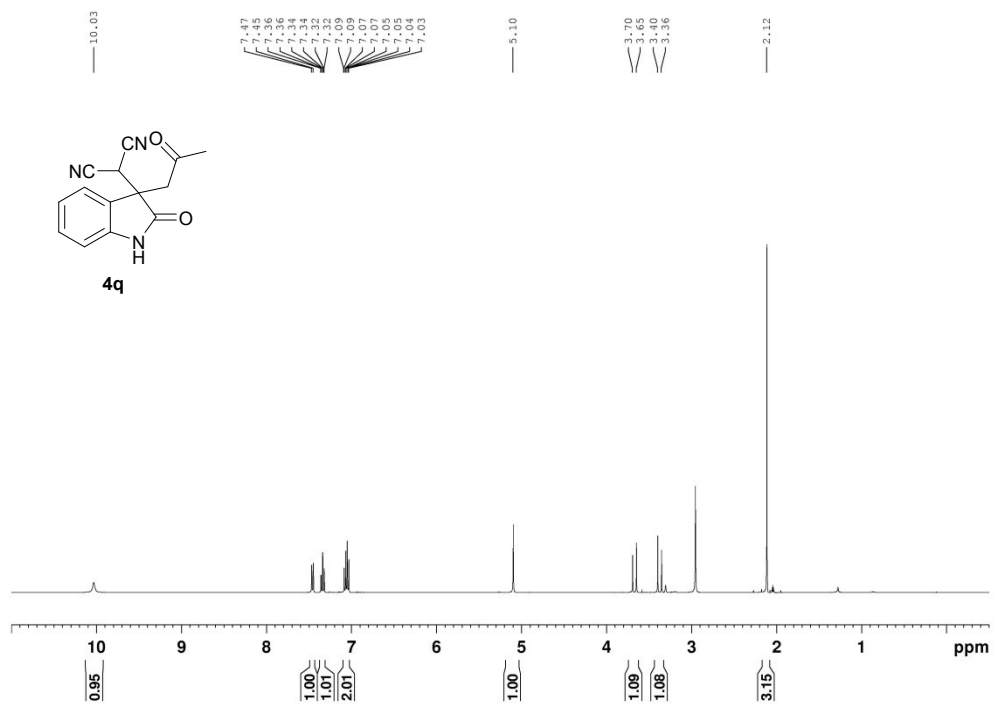



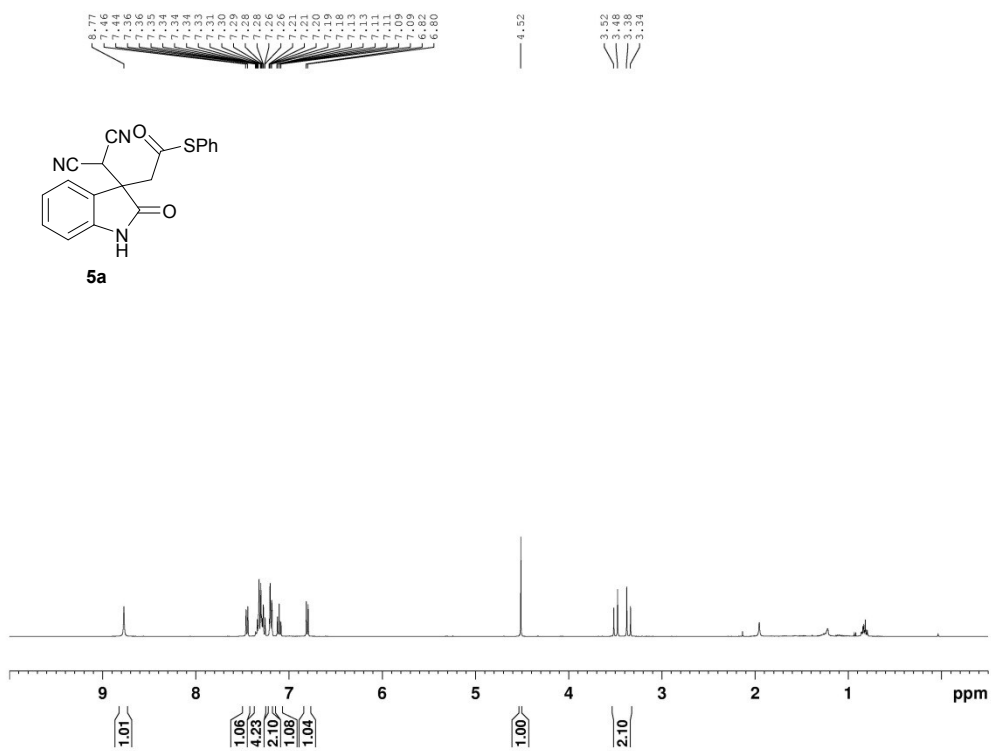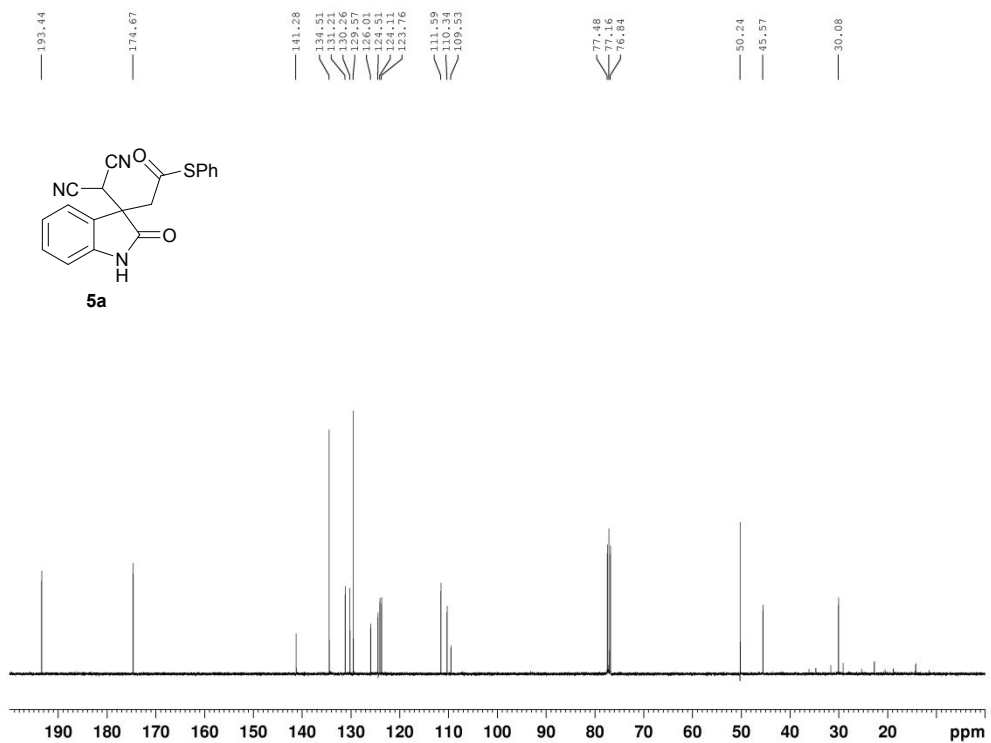



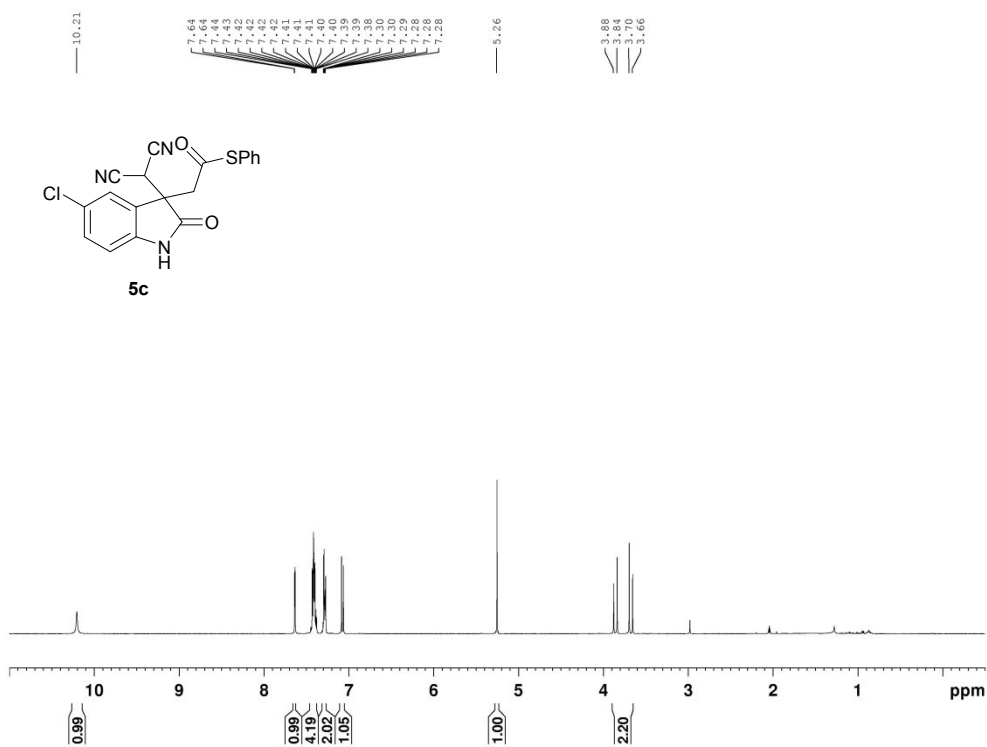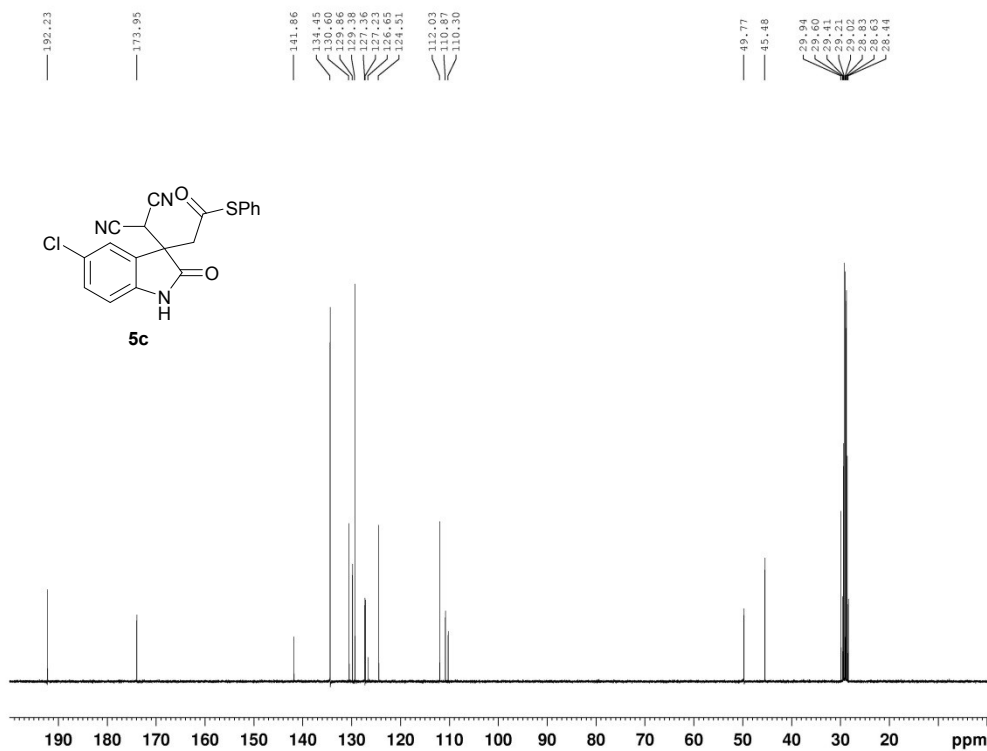



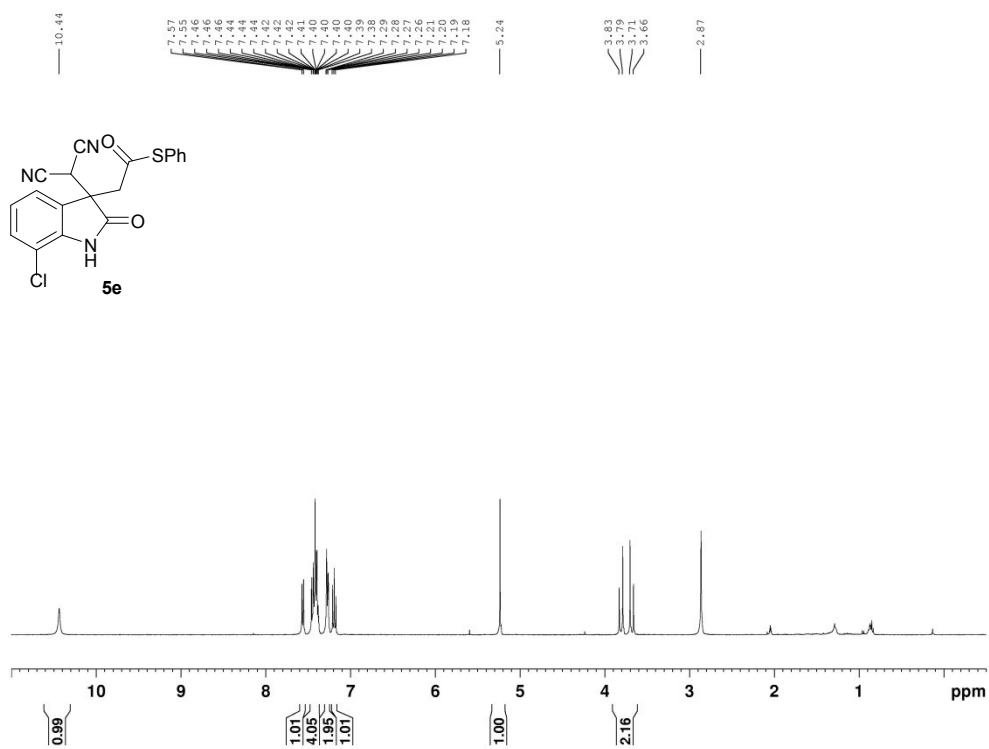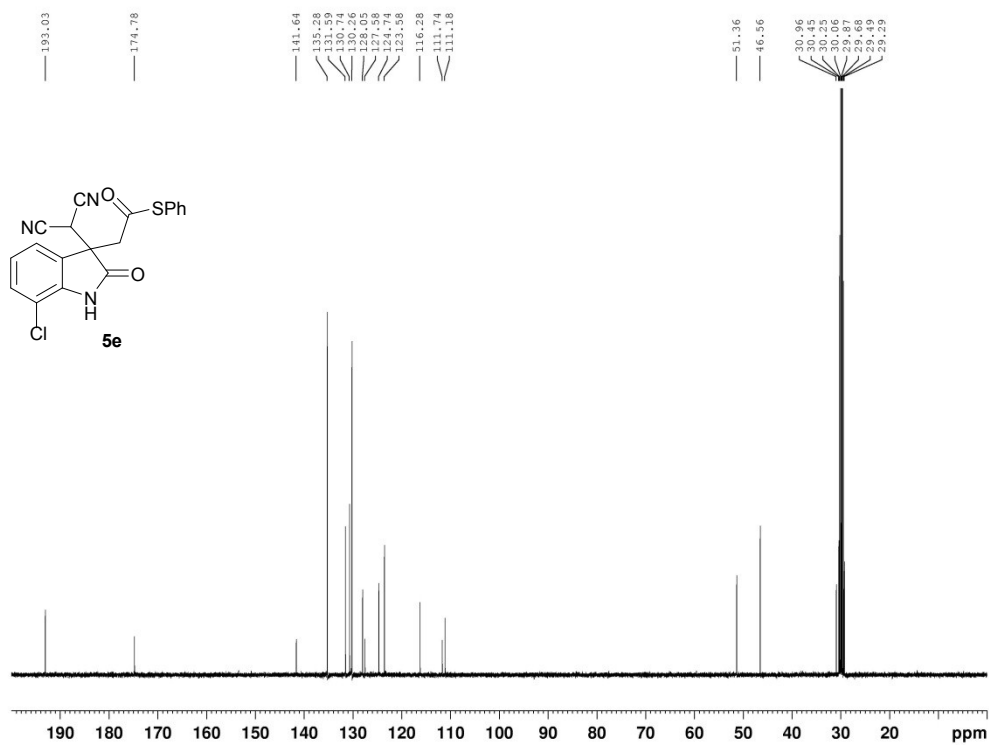

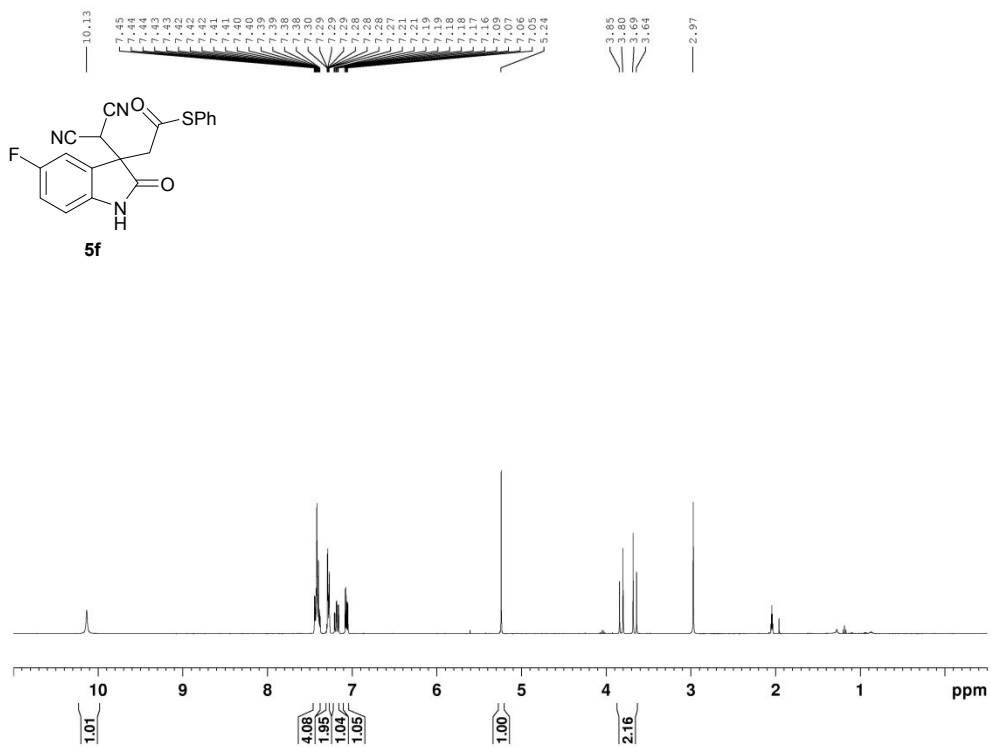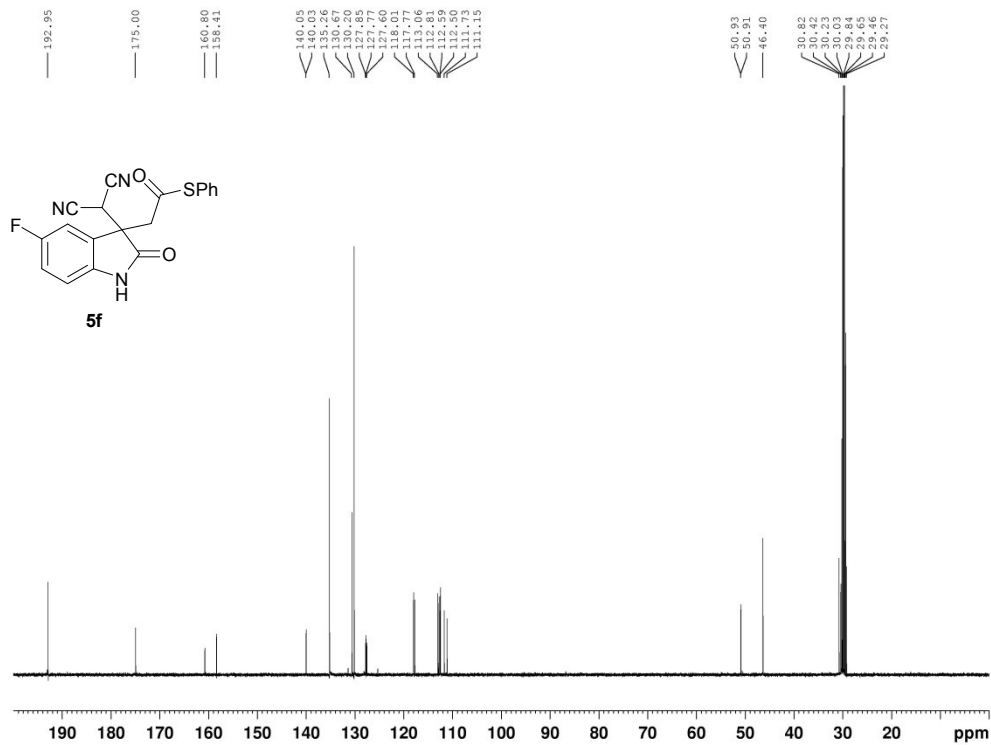

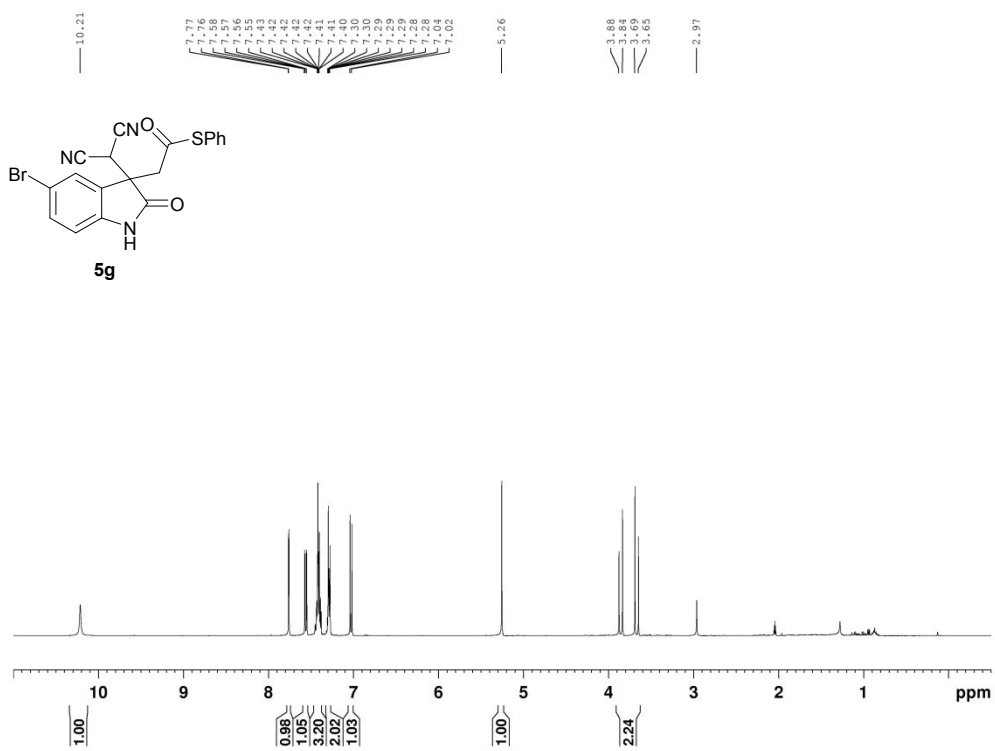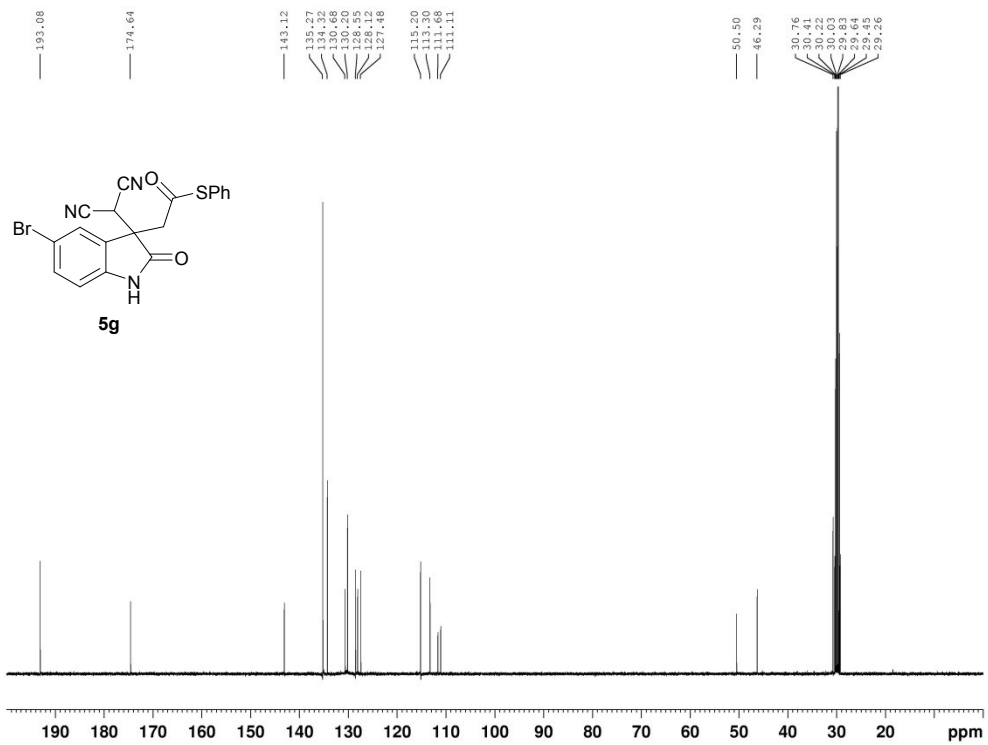

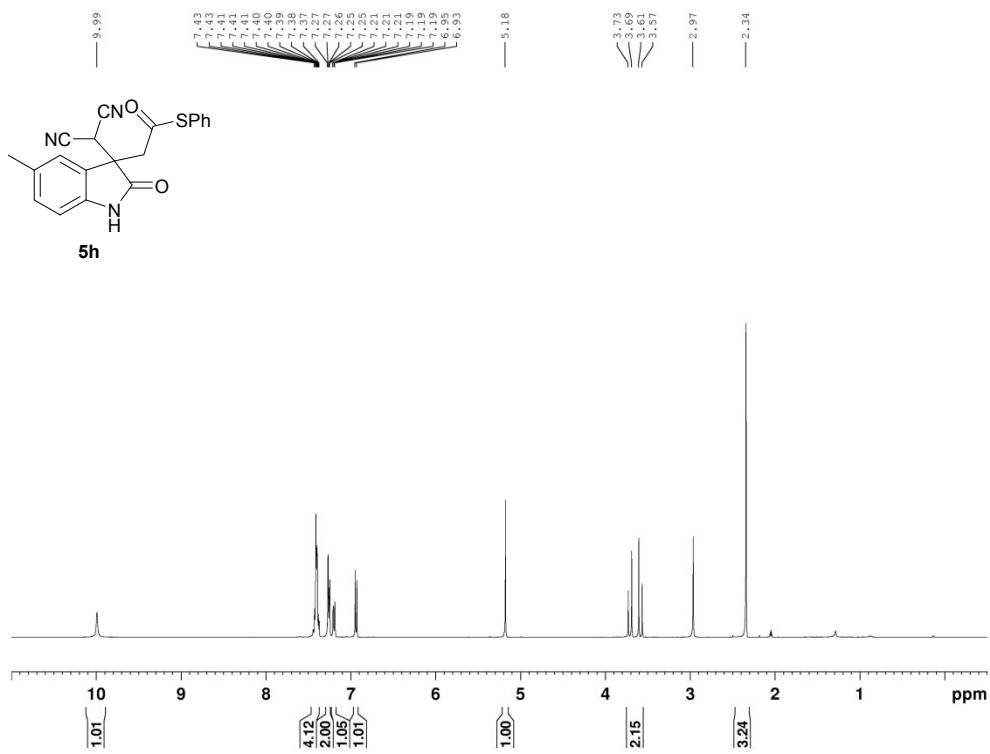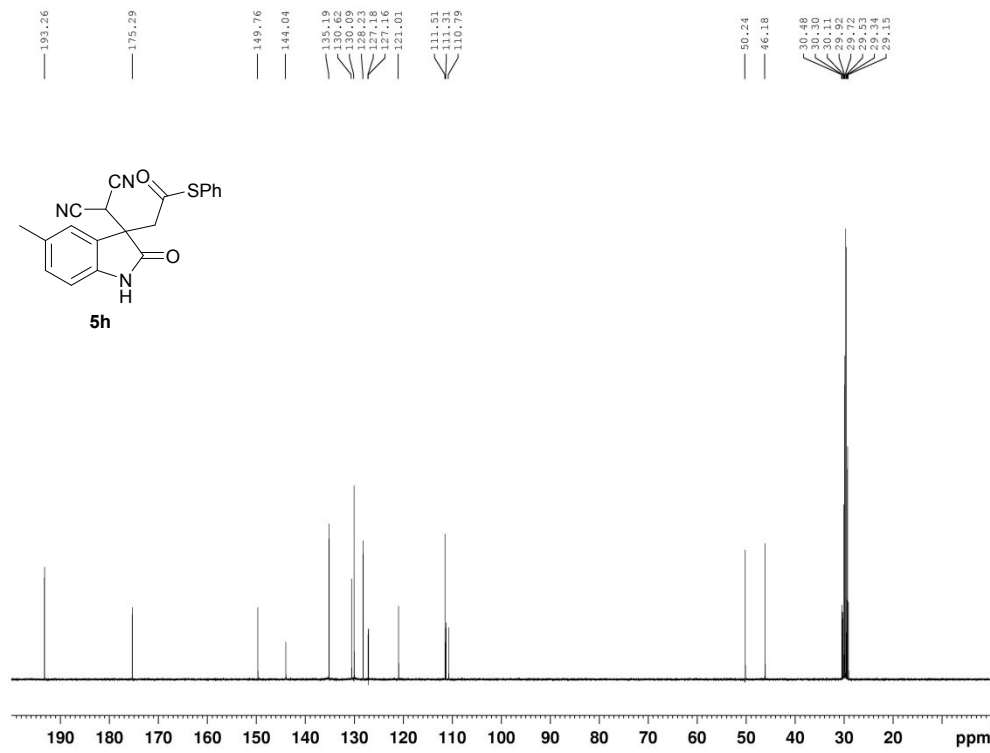



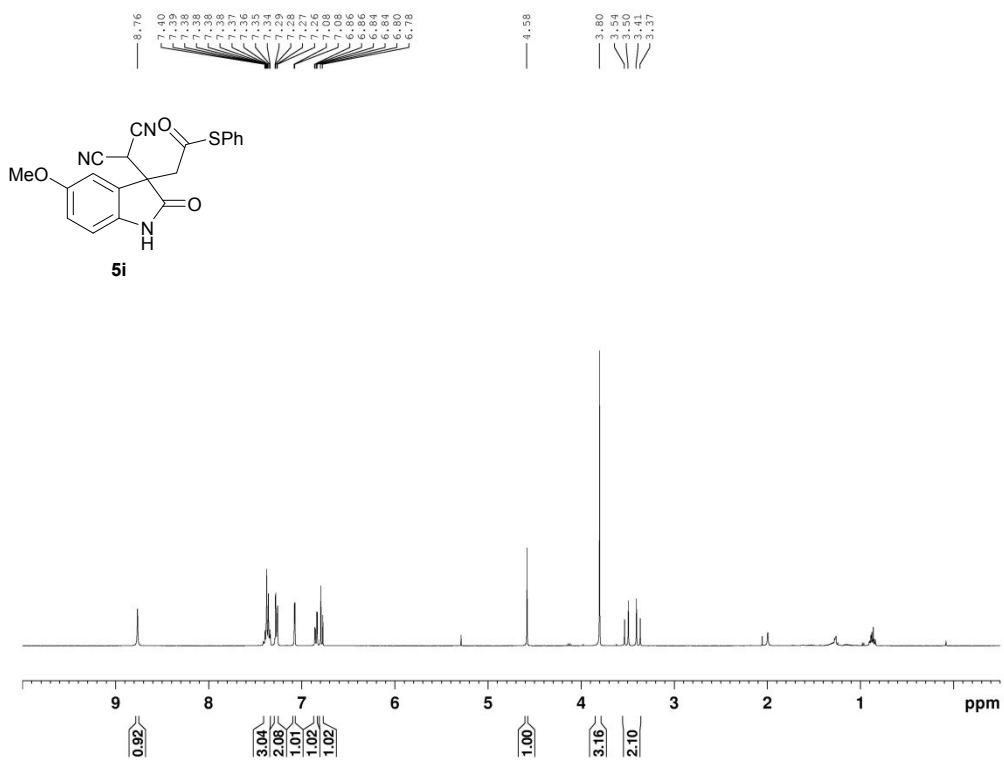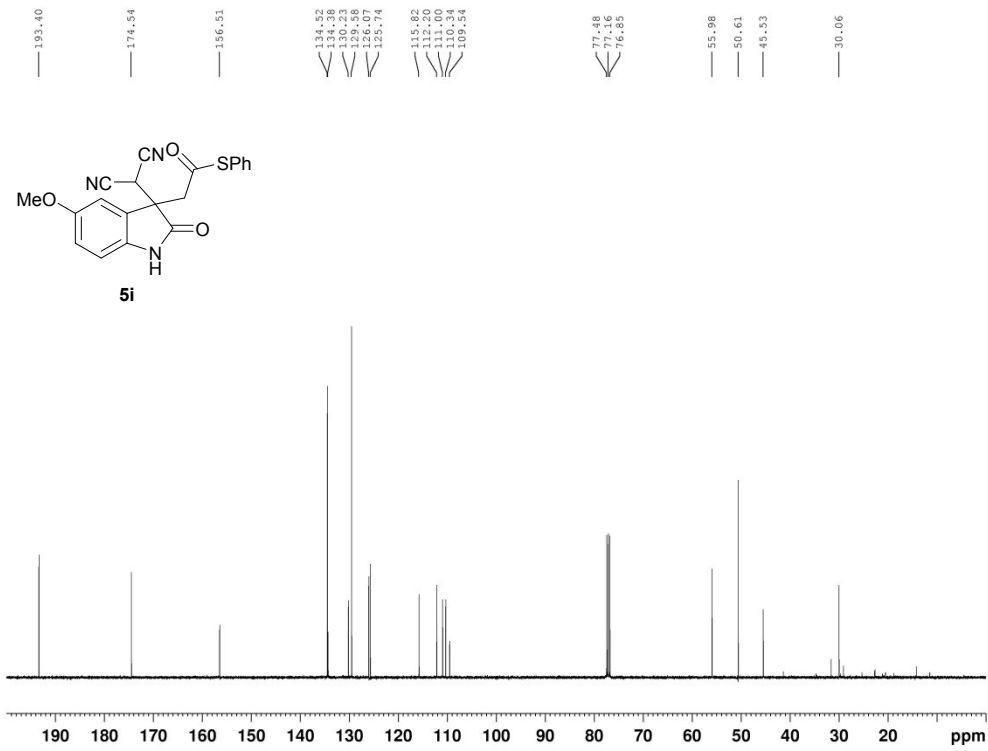



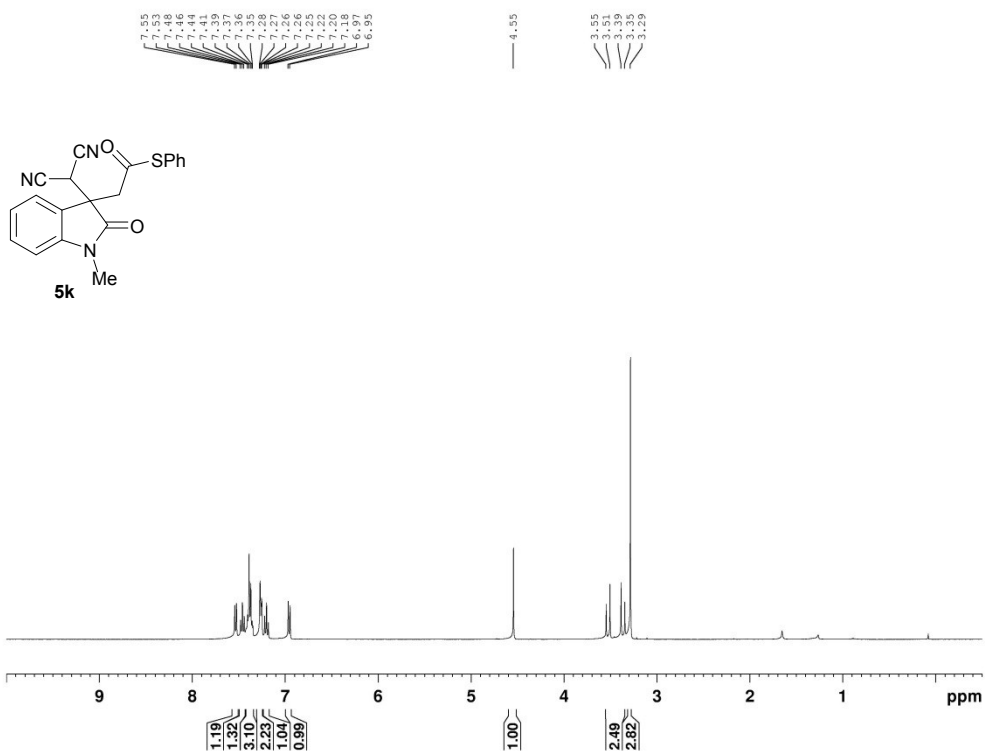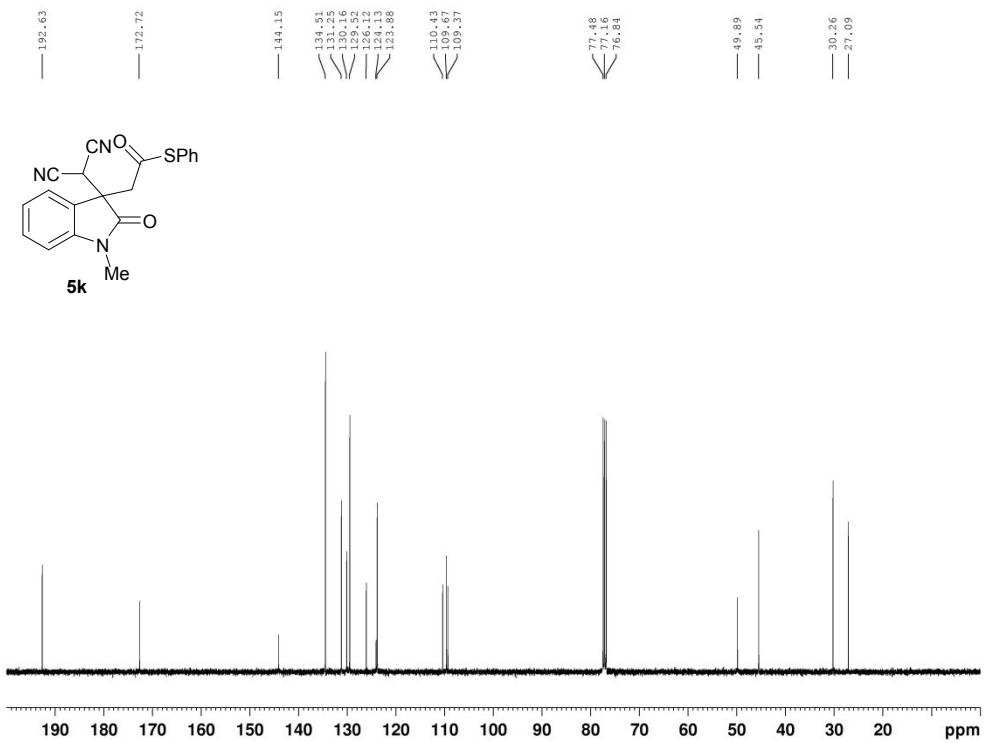

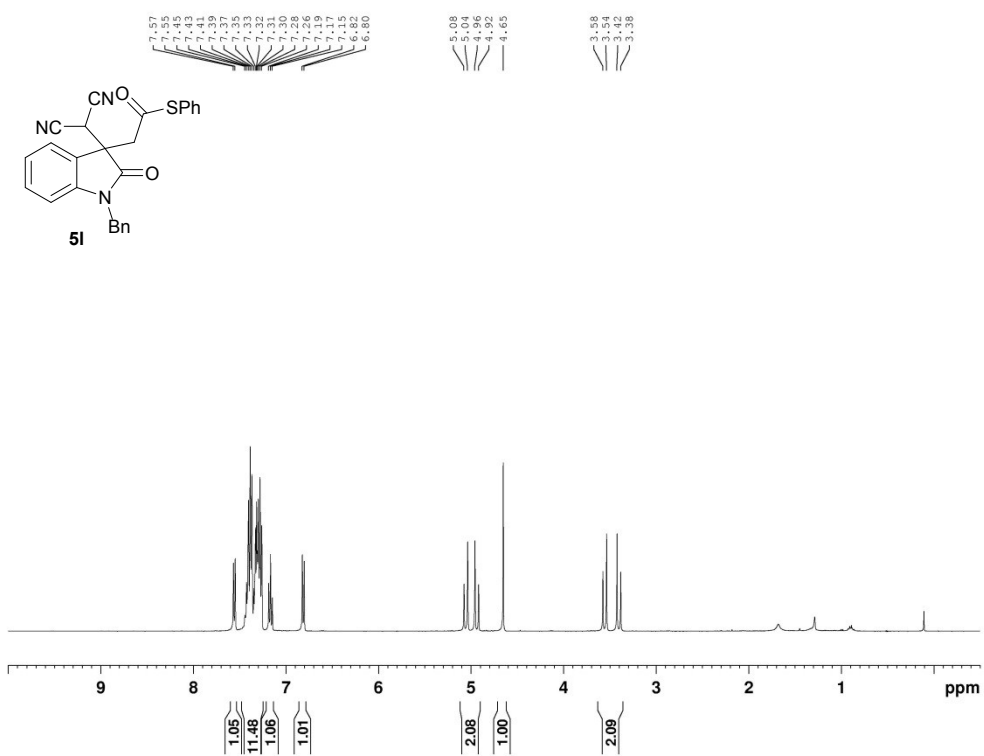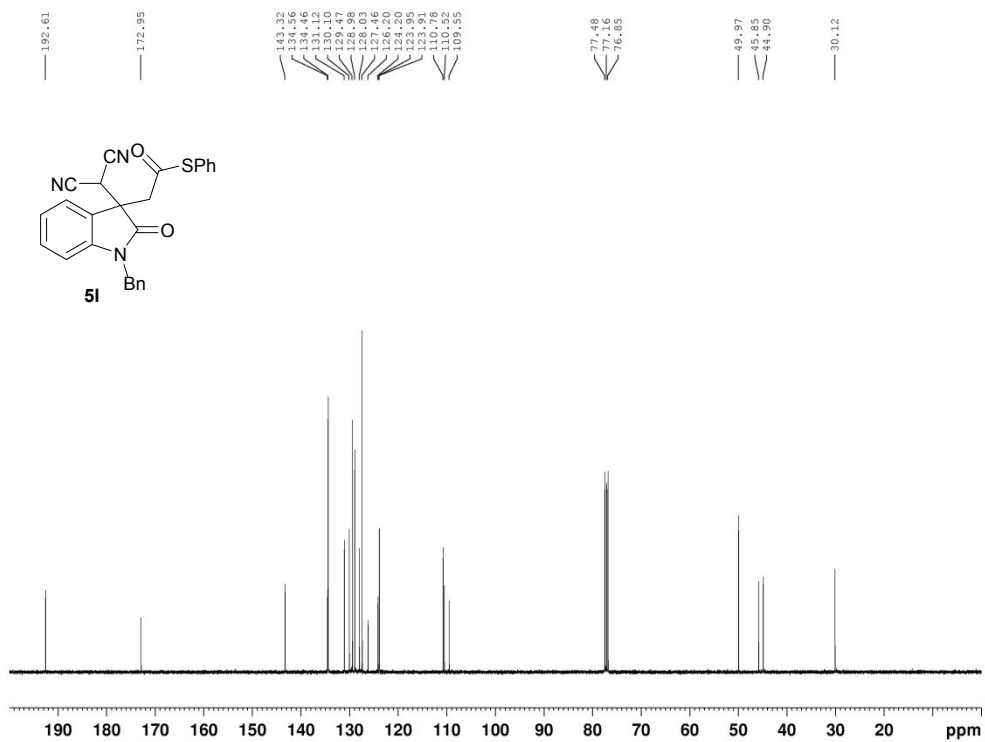

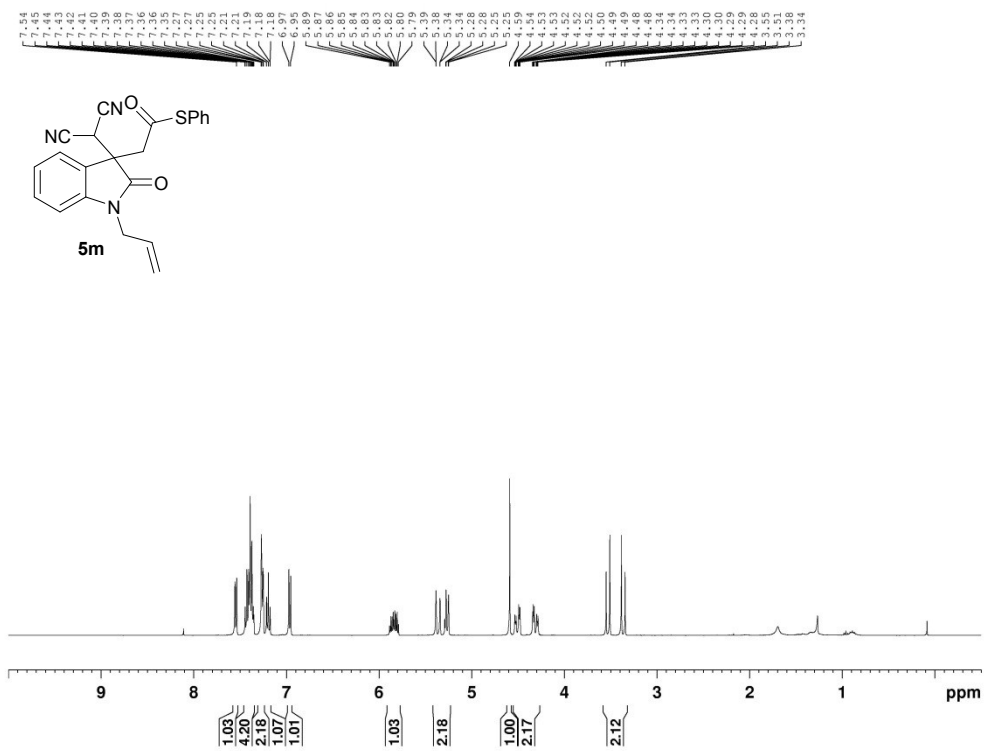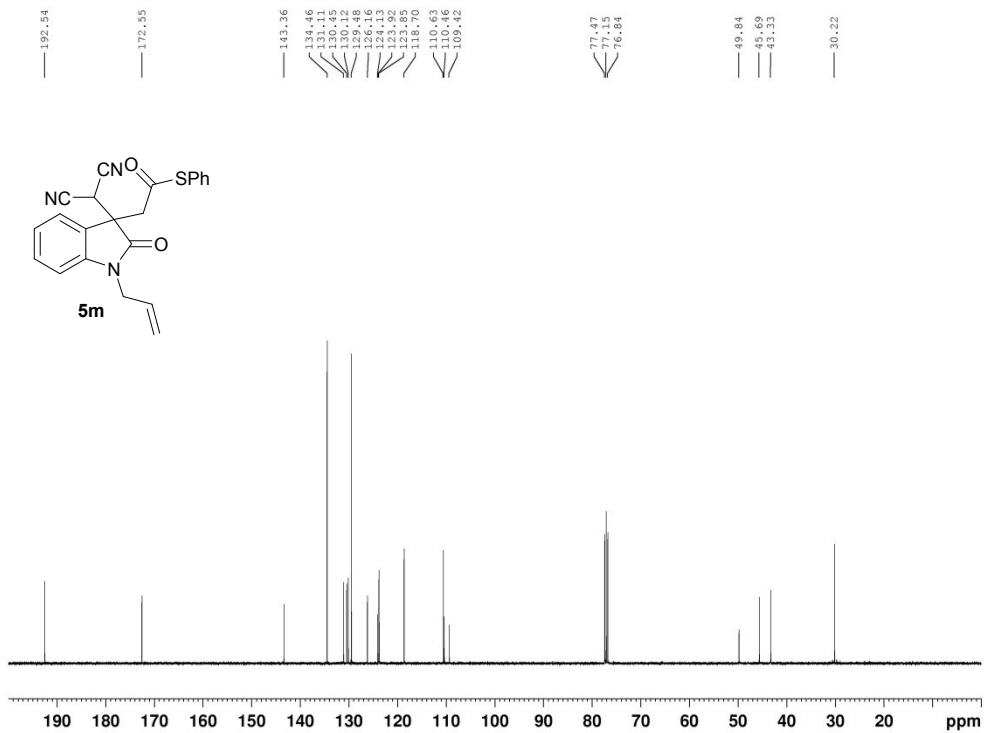

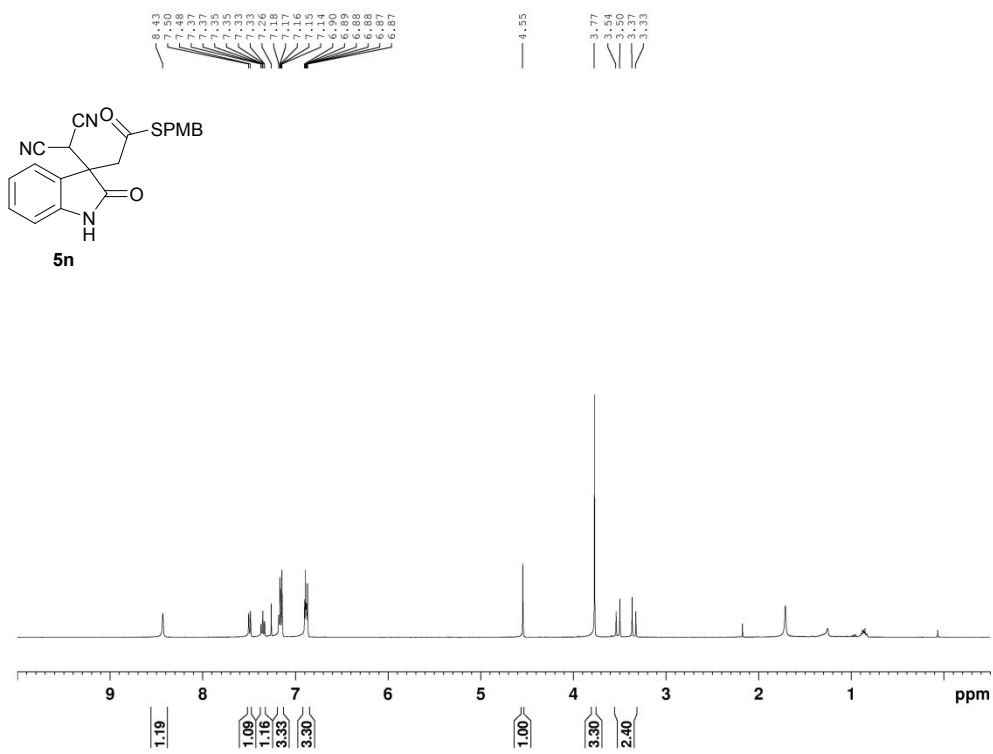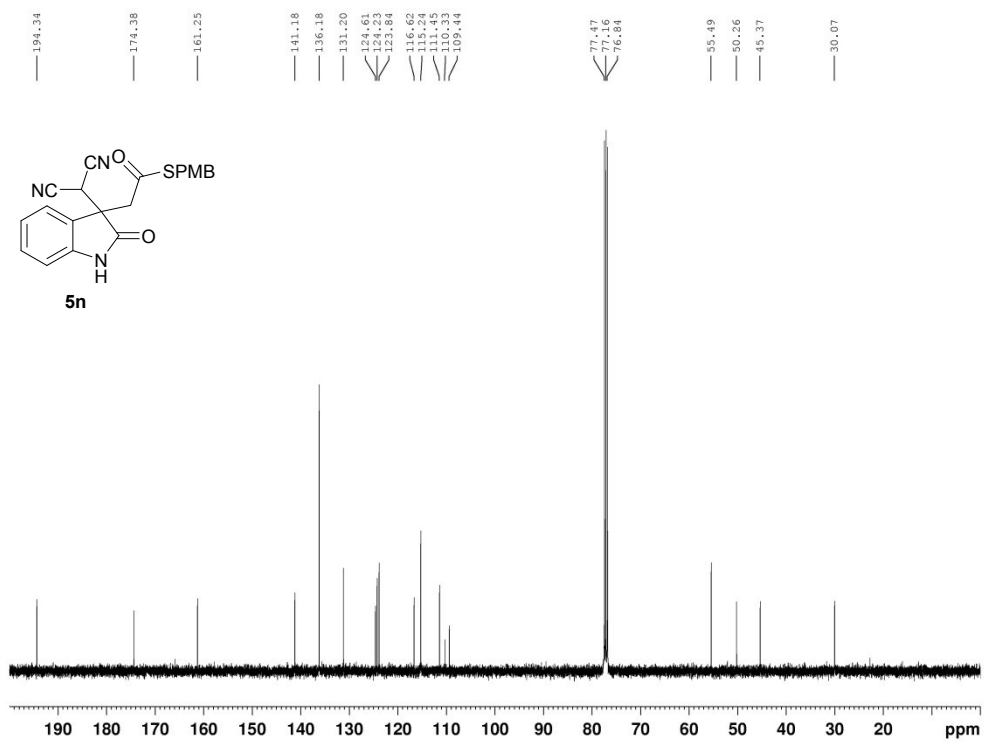

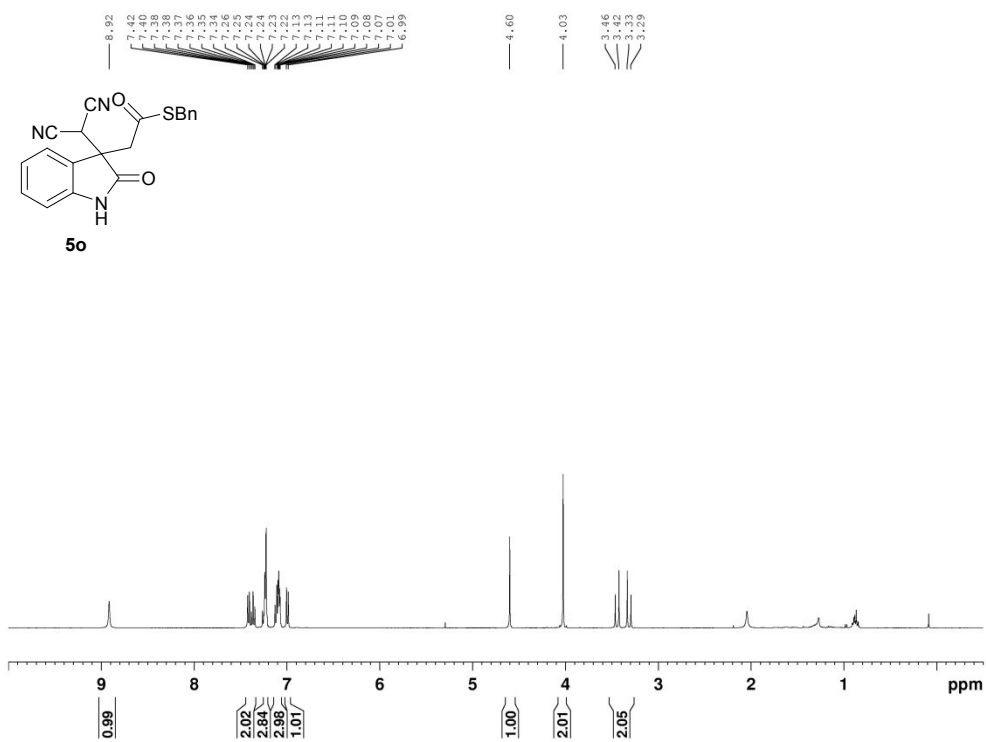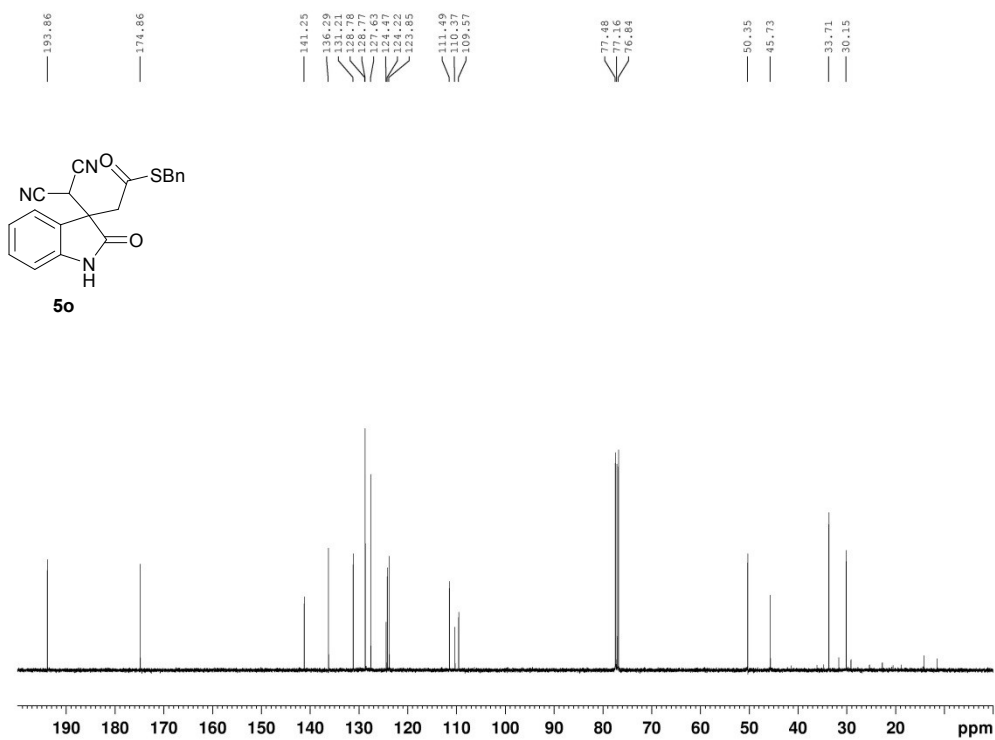

Supplement: c6ra16975a1.pdf [file c6ra16975a1.pdf]
